# Supplementary material for: Splicing of long non-coding RNAs primarily depends on polypyrimidine tract and 5′ splice-site sequences due to weak interactions with SR proteins
Source: PubMed Central journal article supplement — Nucleic Acids Res. 2018 Nov 16;47(2):911–28. doi: 10.1093/nar/gky1147 (PMC6344860; doi:10.1093/nar/gky1147), 2018-11-16
Supplement: gky1147_supplemental_files.pdf [file gky1147_supplemental_files.pdf]

## **SUPPLEMENTARY DATA**

### **Splicing of Lon Non-Coding RNAs Primarily Depends on Polypyrimidine Tract and 5' Splice-Site Sequences Due to Weak Interactions with SR Proteins**

Zuzana Krchňáková, Prasoon Kumar Thakur, Michaela Krausová, Nicole Bieberstein, Nejc Haberman, Michaela Müller-McNicoll and David Staněk

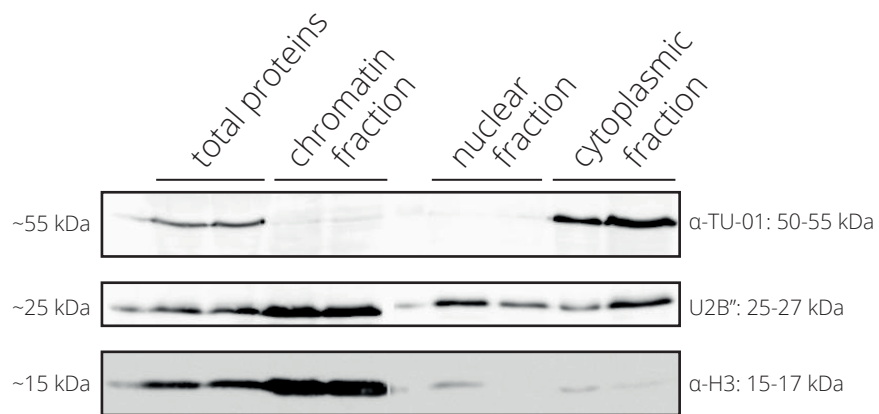

**Figure S1.** Western blot line of total proteins and proteins from cellular fractionations of HeLa cells (two biological replicates). Anti- $\alpha$ -tubulin, anti-U2B'', and anti-histone3 antibodies detect the cytoplasmic, nucleoplasmic, and chromatin fractions, respectively.

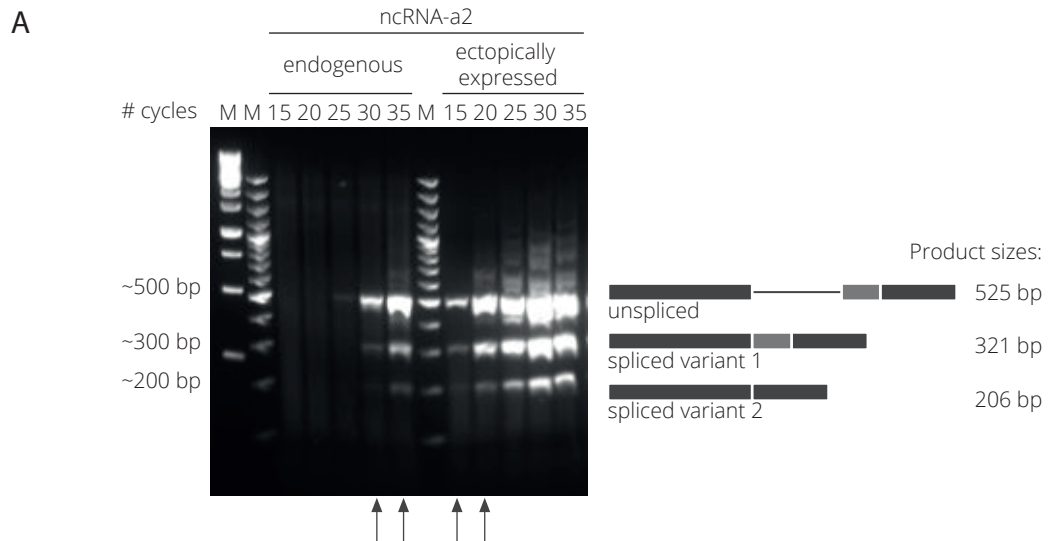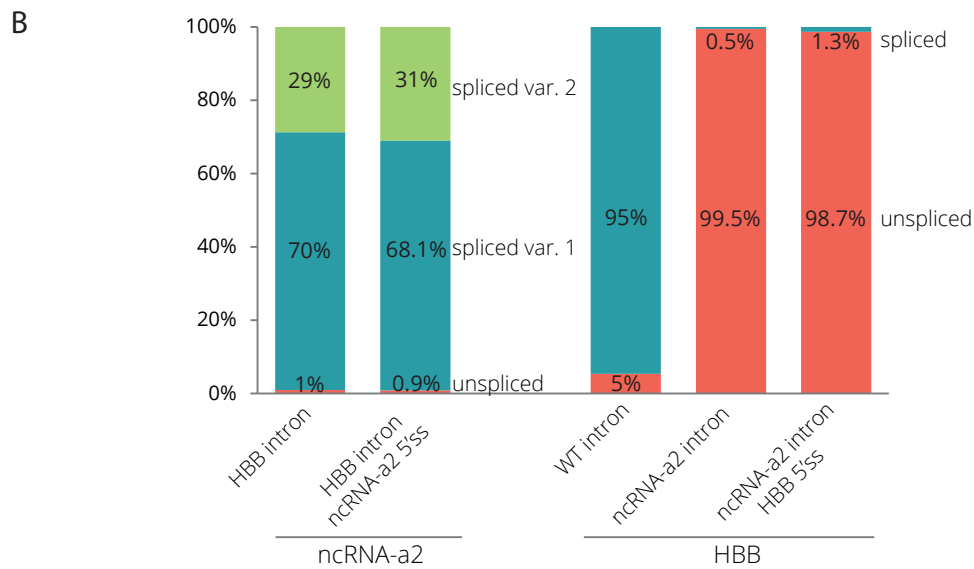

**Figure S2. (A)** Splicing efficiency of endogenous and ectopically expressed ncRNA-a2 measured by semiquantitative RT-PCR. Results are quantified from experiments indicated by arrows; M - marker. **(B)** Fractions of spliced and unspliced transcripts of ncRNA-a2 and HBB after intron swapping.

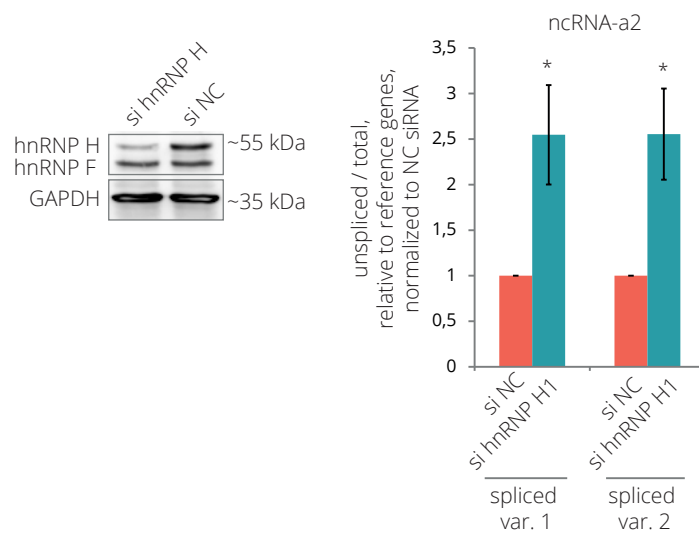

**Figure S3.** The fraction of unspliced transcripts of the ncRNA-a2 gene after hnRNP H siRNA knock-down. Barplots show relative RNA levels as determined by RT-qPCR. The mean of at least three independent experiments is shown. Error bars indicate SEM; asterisks indicate the statistical significance levels calculated by two-tailed Student's T-test comparing the hnRNP H knock-down with negative control, \* $p < 0.05$ .

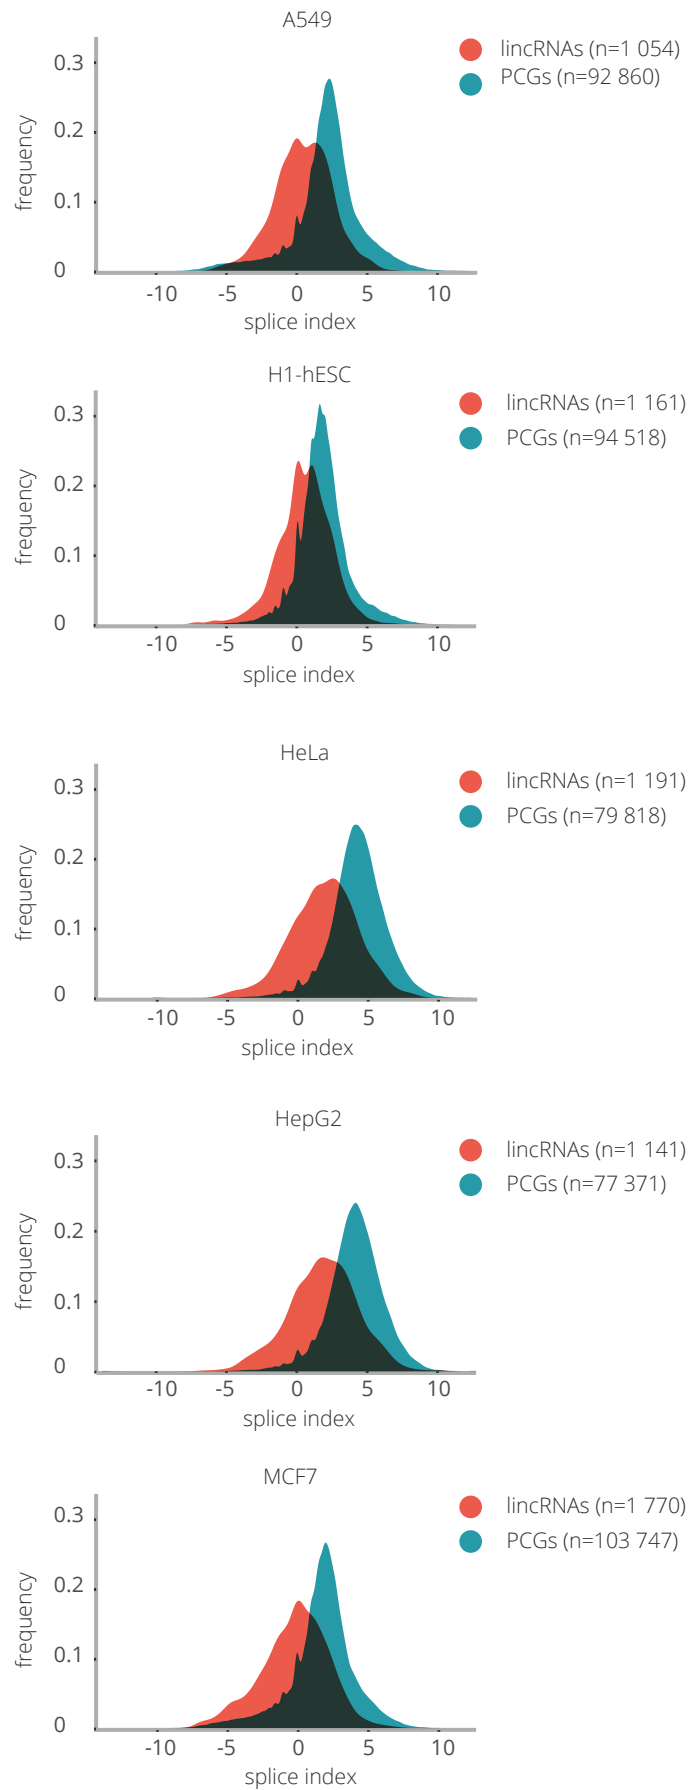

**Figure S4.** Splice index scores of introns in lincRNAs and PCGs in five different human cell lines; n = the number of introns.

A

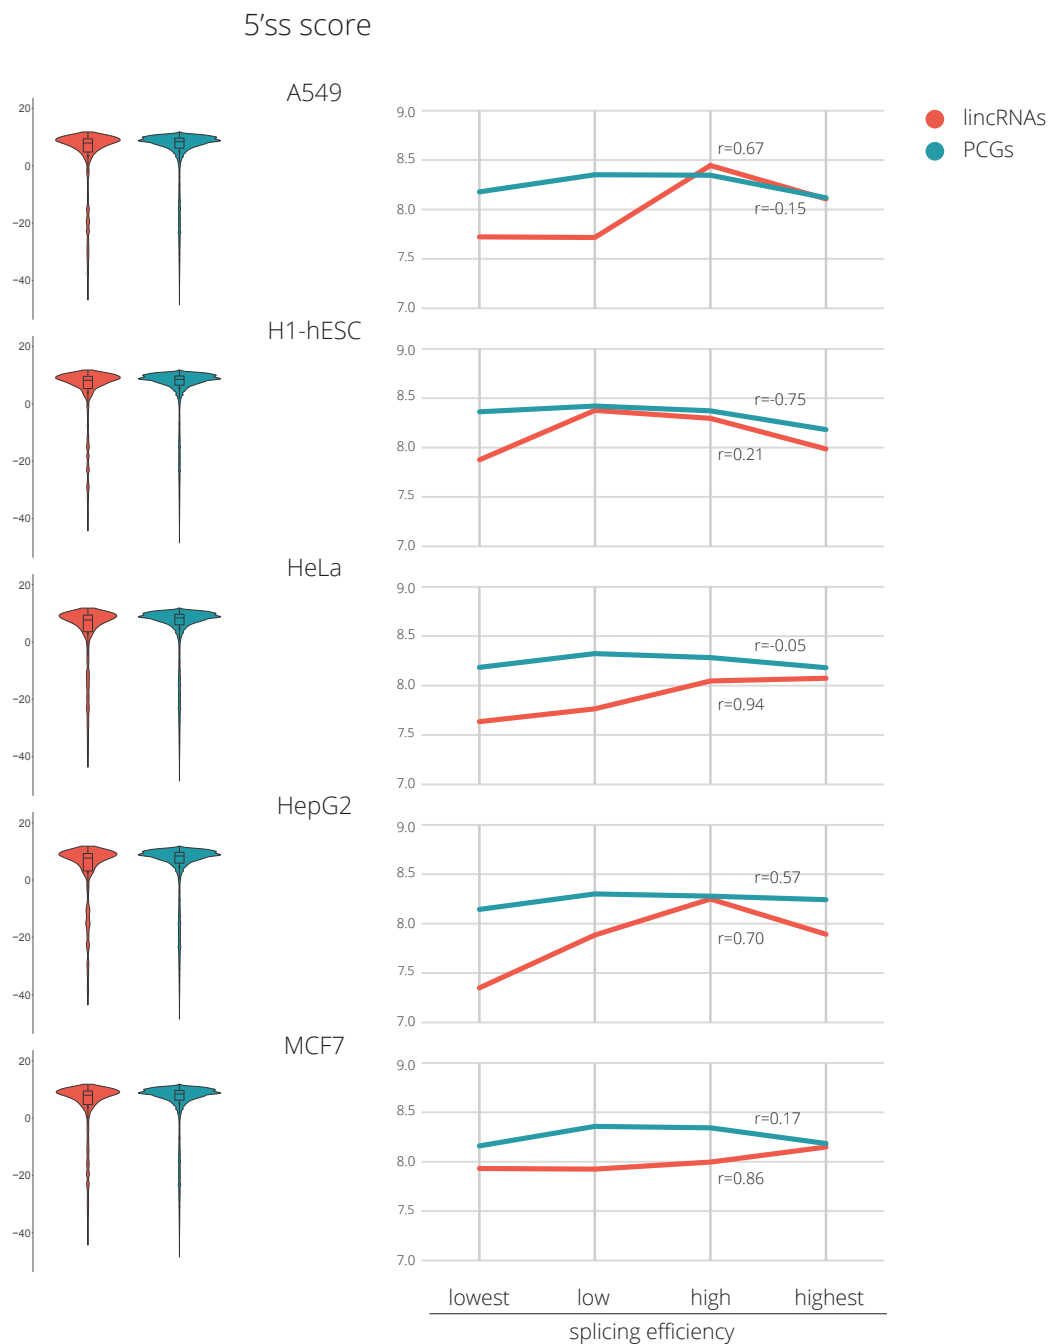

B

Average splicing index (SI)

|  | lincRNAs            |         |       |       |       | PCGs  |         |       |       |      |      |
|--|---------------------|---------|-------|-------|-------|-------|---------|-------|-------|------|------|
|  | A549                | H1-hESC | HeLa  | HepG2 | MCF7  | A549  | H1-hESC | HeLa  | HepG2 | MCF7 |      |
|  | splicing efficiency | lowest  | -2.17 | -1.98 | -1.25 | -1.36 | -3.44   | -0.83 | -0.29 | 1.90 | 1.67 |
|  | low                 | -0.18   | 0.04  | 1.24  | 1.17  | -0.75 | 1.83    | 1.32  | 3.82  | 3.66 | 1.41 |
|  | high                | 1.23    | 1.18  | 2.76  | 2.72  | 0.72  | 2.80    | 2.17  | 4.88  | 4.74 | 2.44 |
|  | highest             | 2.98    | 2.79  | 4.82  | 4.91  | 2.72  | 4.97    | 4.06  | 6.67  | 6.50 | 4.37 |

**Figure S5. (A)** 5'ss score distribution in lincRNAs and PCGs in five different cell lines (left panel); 5'ss scores divided according to splicing efficiency of lincRNAs and PCGs (right panel);  $r$  - Pearson's correlation coefficient between 5'ss score and splicing index. **(B)** A table of mean splicing indexes (SIs) of lincRNAs and PCGs in four groups divided according to the splicing efficiencies.

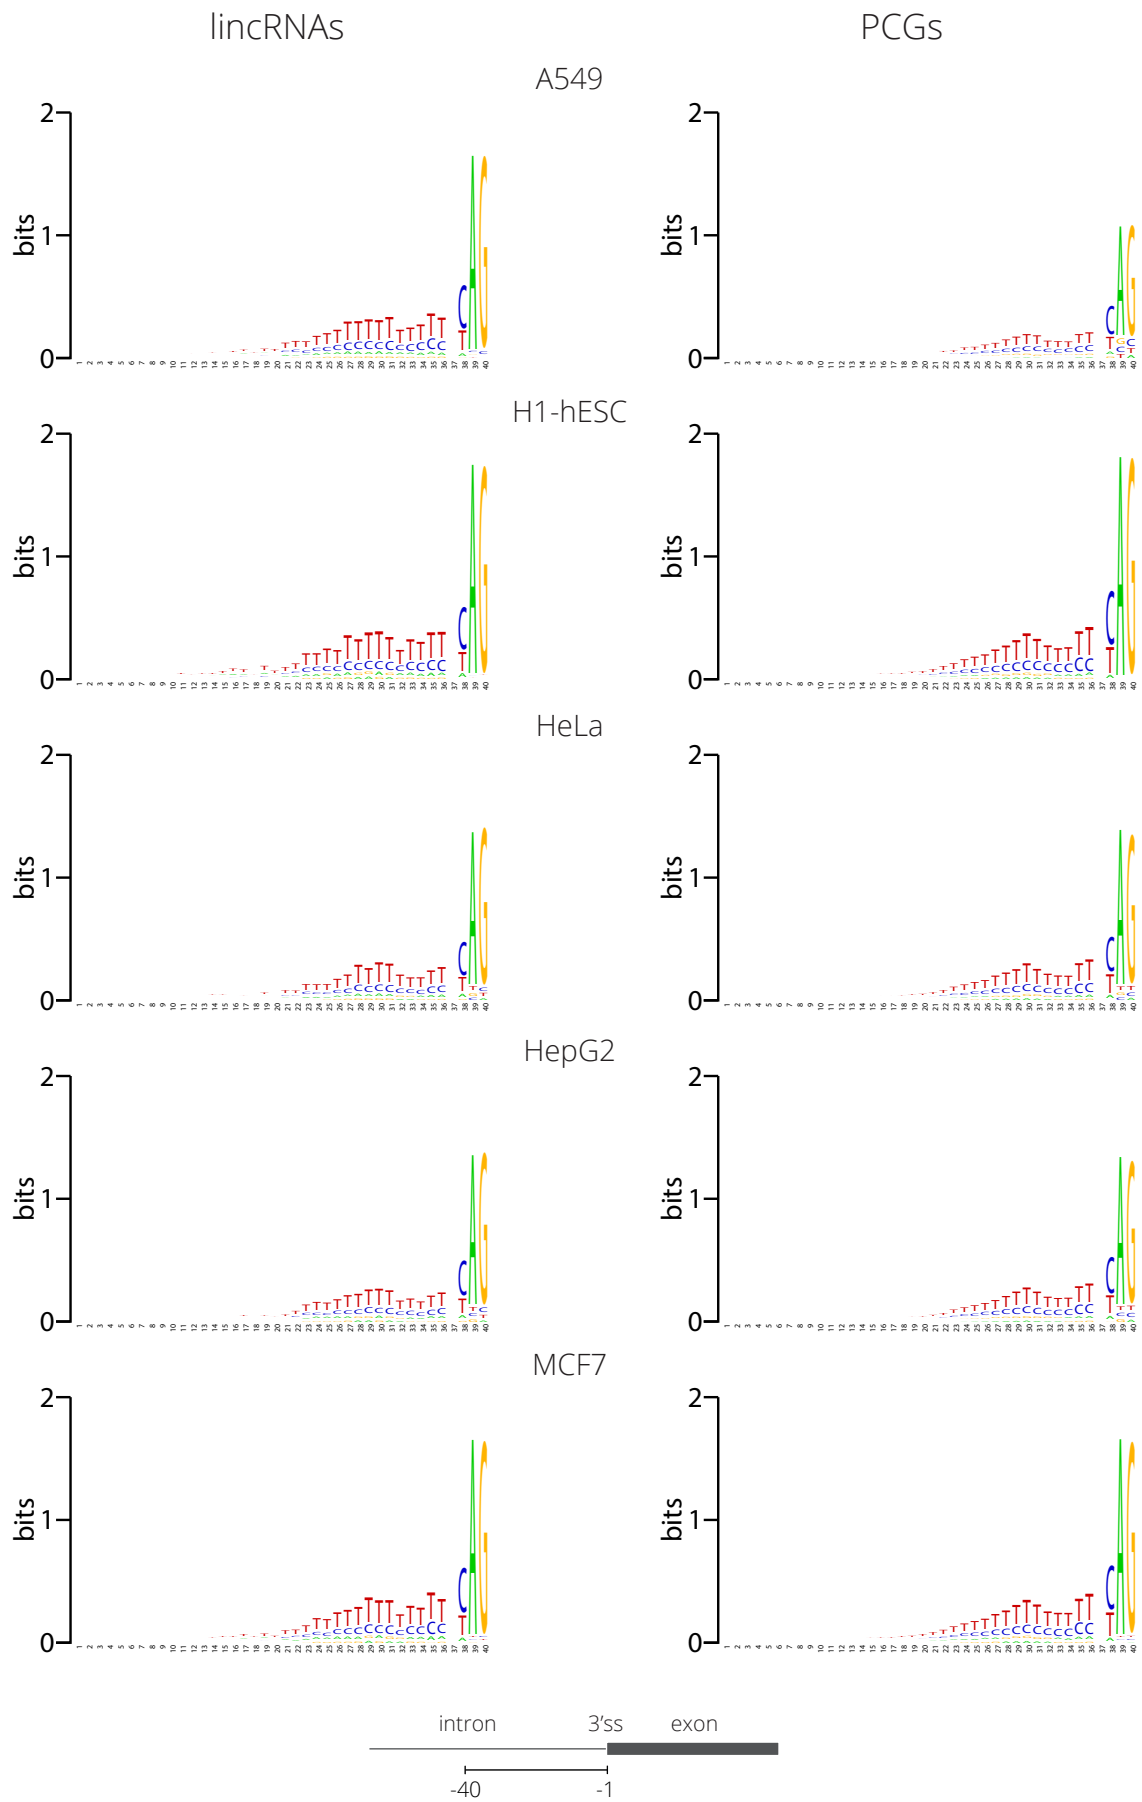

**Figure S6.** Sequence logos of 3'ss and PPT regions in lincRNAs and PCGs in different cell lines.

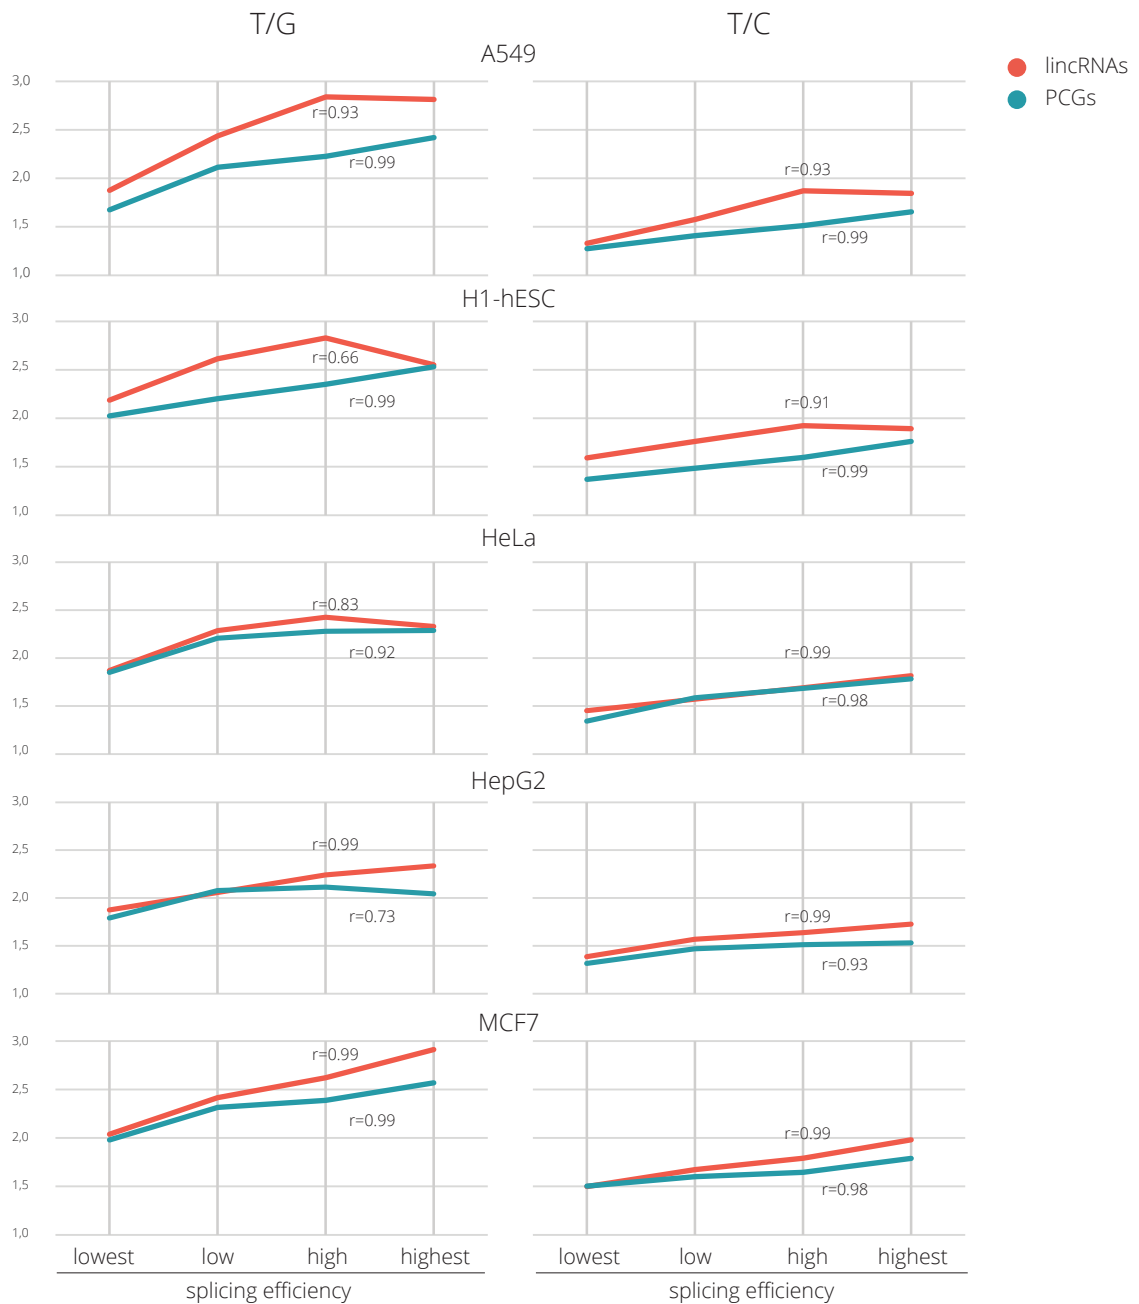

**Figure S7.** Thymidines over guanidines (T/G) or cytidines (T/C) ratio frequencies in the PPT region in different cell lines divided according to splicing efficiency in lincRNAs and PCGs; r - Pearson's correlation coefficient between T content in PPT and splicing index. Splicing groups are the same as at Figure S5.



splicing efficiency

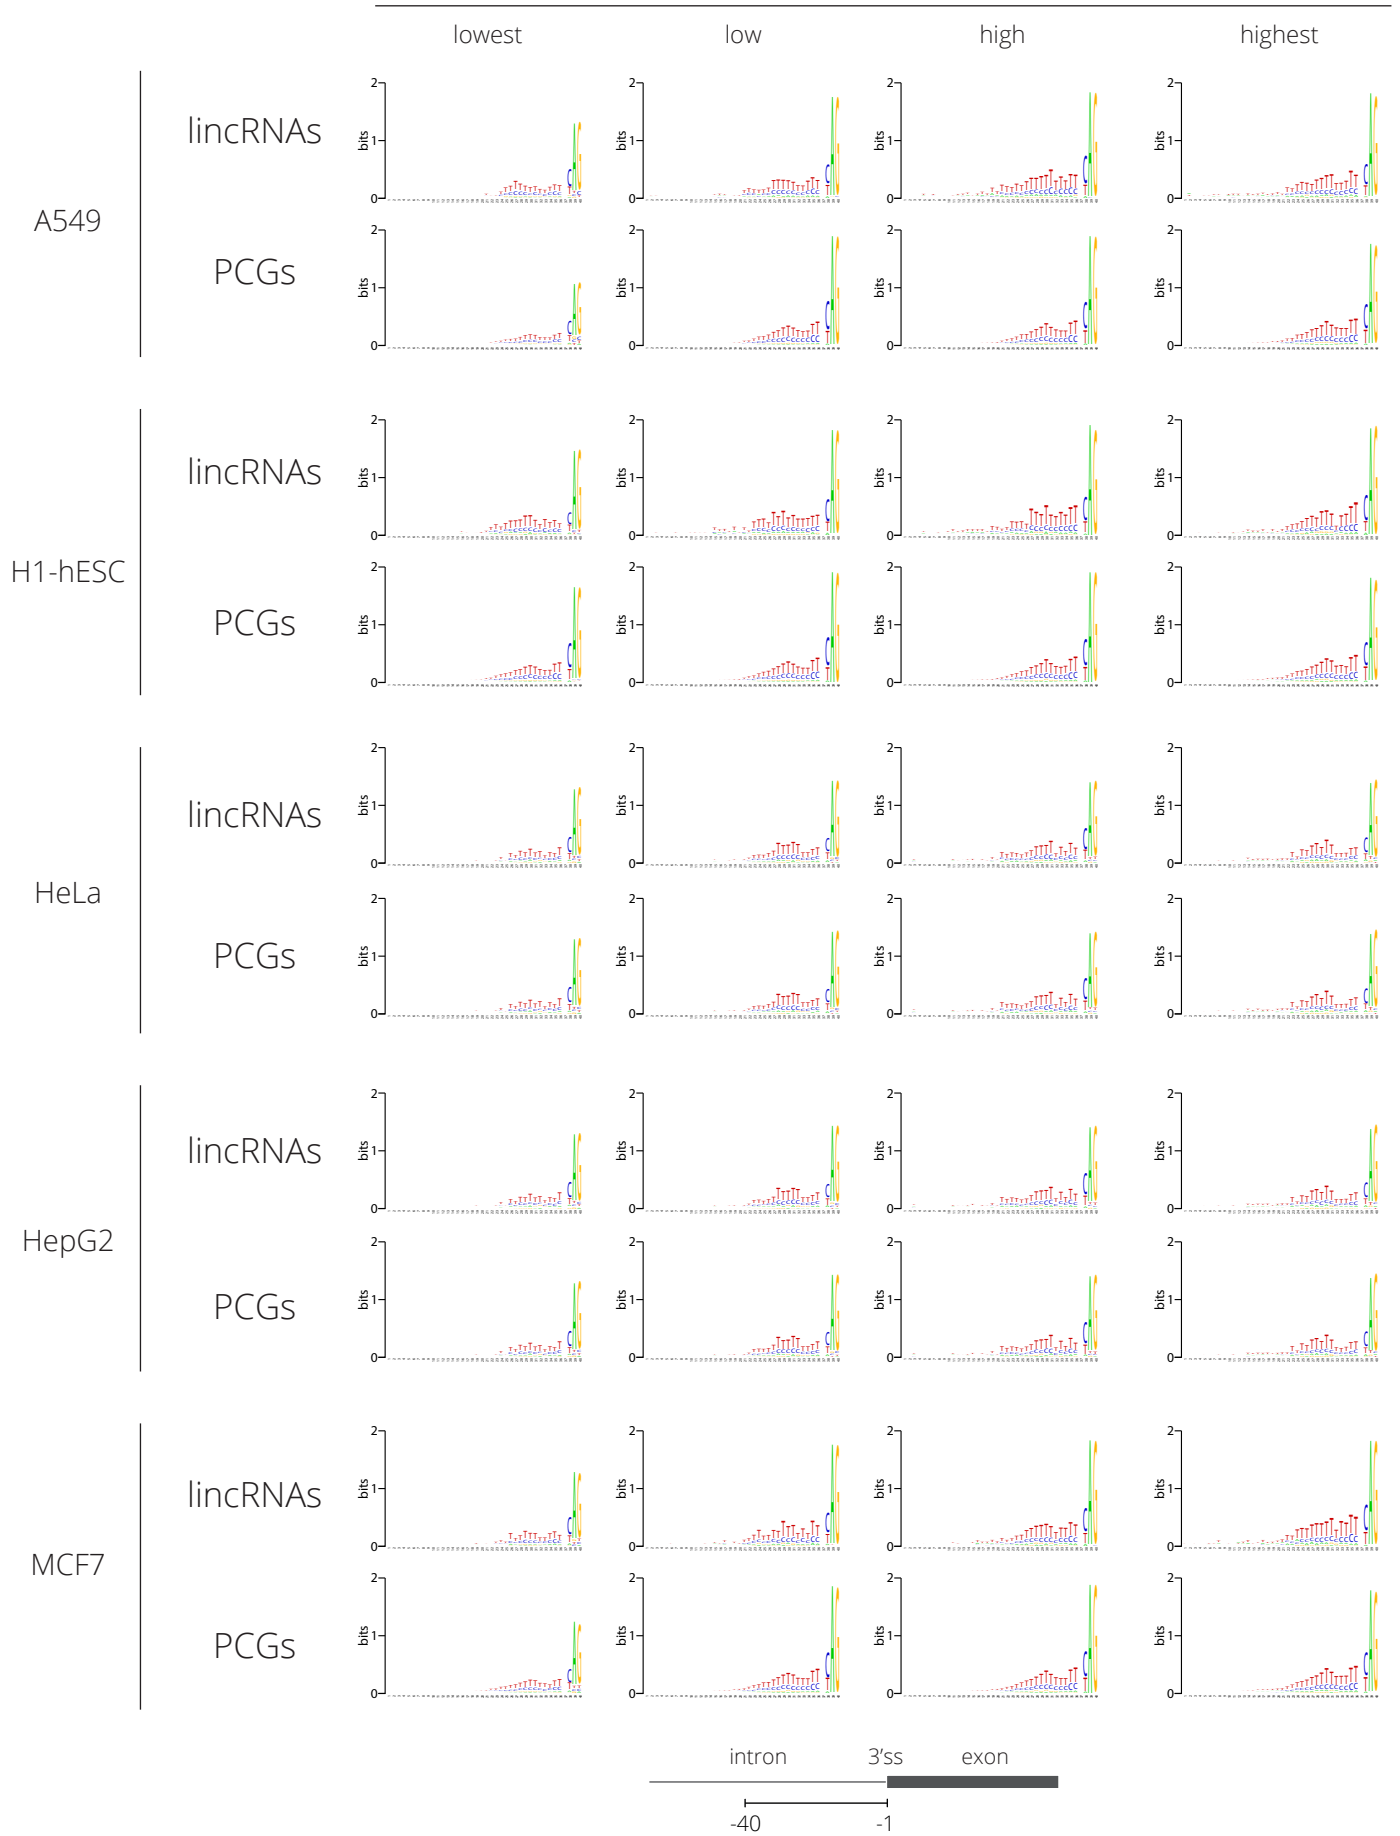

**Figure S8.** Sequence logos in 3'ss and PPT regions in lincRNAs and PCGs in different cell lines divided according to splicing efficiency.

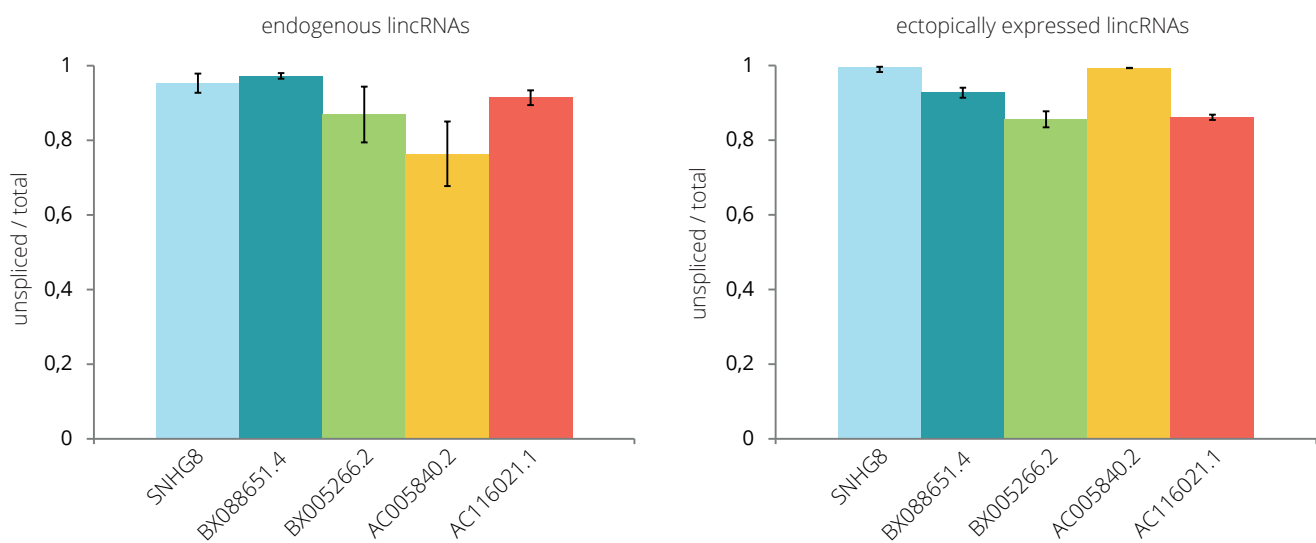

**Figure S9.** Inefficient splicing of selected lincRNAs. Splicing efficiencies of endogenous lincRNAs (left) and splicing efficiencies of transiently expressed lincRNAs (right). Splicing efficiencies are measured as a fraction of unspliced transcripts relative to total amount of transcripts. Bar-plots show RNA levels as determined by RT-qPCR. Average of at least three independent experiments is shown. Error bars indicate  $\pm$  SEM.

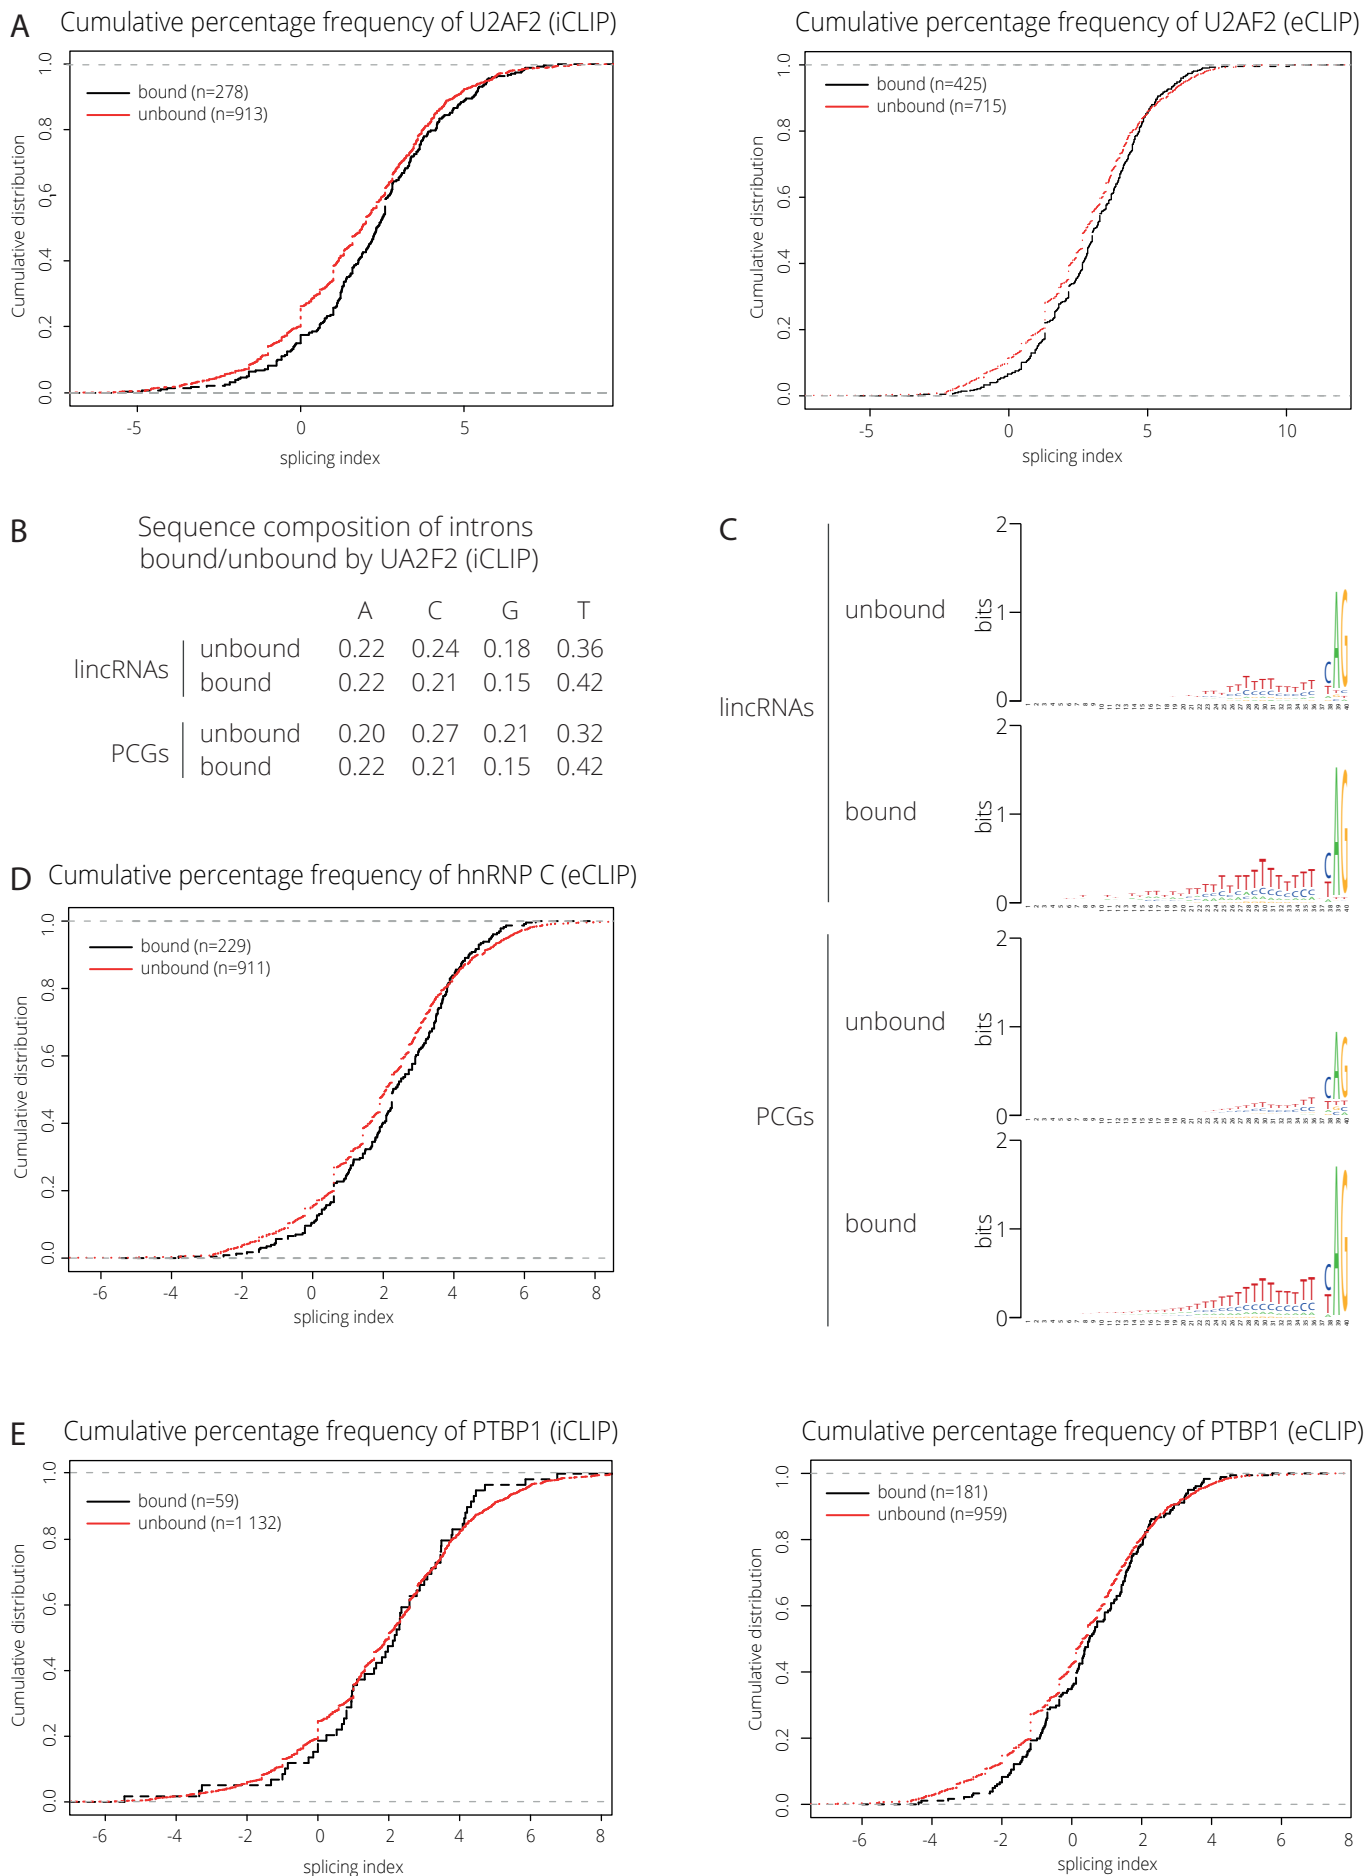

**Figure S10.** Cumulative distribution of splicing efficiency (**A**), sequence composition (**B**) and logos of 40 nt upstream of 3'ss (**C**) of lincRNA introns bound and unbound by U2AF2. Cumulative distribution of splicing efficiency comparing hnRNP C-bound and unbound lincRNAs (**D**), and PTBP1-bound and unbound lincRNAs (**E**); n=number of genes. PCGs serves as a control.

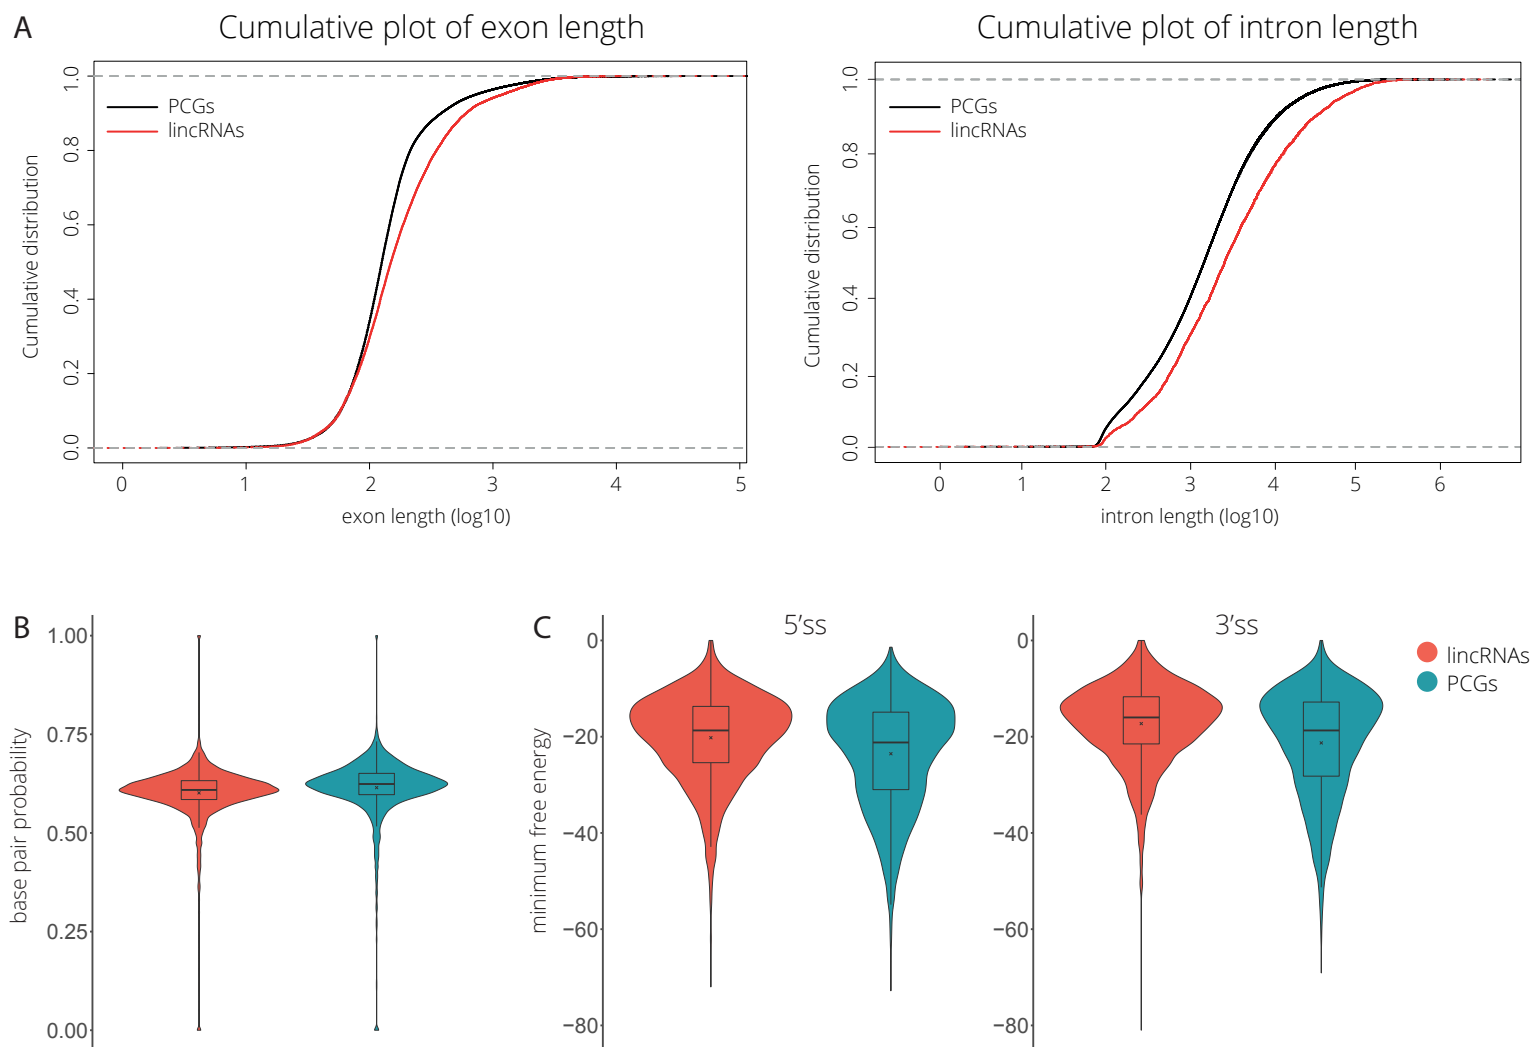

**Figure S11.** (A) Cumulative distributions of exon and intron lengths in lincRNAs and PCGs. (B) Base pair probability of 5000 randomly chosen lincRNAs and PCGs shorter than 2000 nts. (C) Minimum free energies of RNA sequences 100 nt upstream and 100 nt downstream of 5'ss (left) and 3'ss (right). 5000 randomly chosen introns from lincRNAs and PCGs were analyzed.

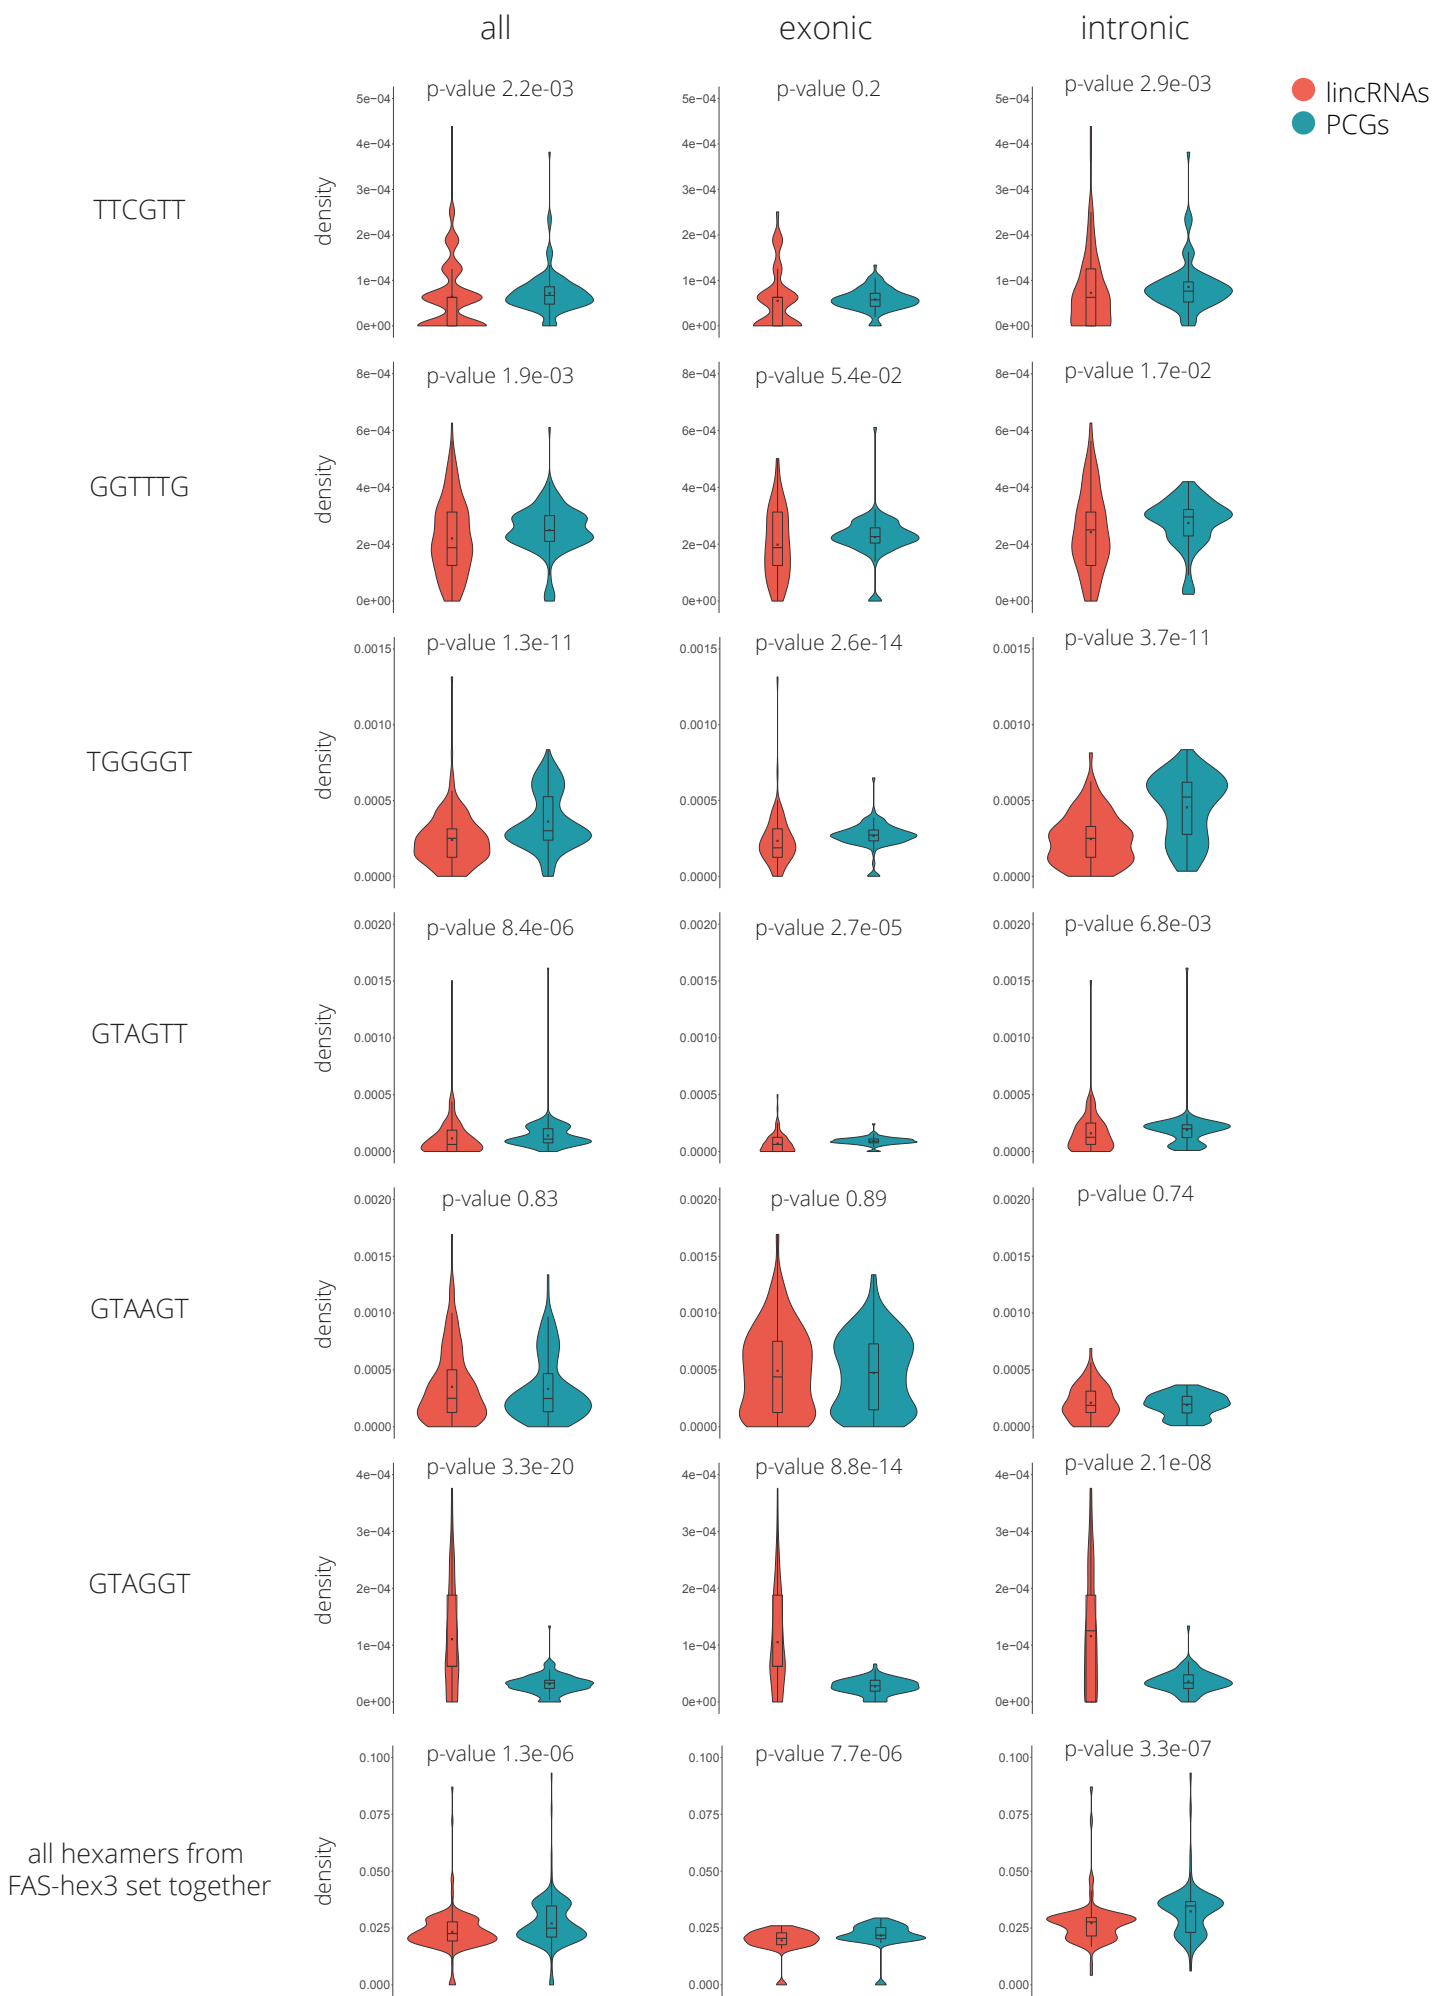

**Figure S12.** Splicing silencer motif distributions 100 nt upstream (intronic) and 100 nt downstream (exonic) of 3'ss in lincRNAs and PCGs. Motifs taken from Wang et al. (2004) and FAS-ESS web server (<http://genes.mit.edu/fas-ess/>). P-values are calculated by Wilcoxon rank sum test.

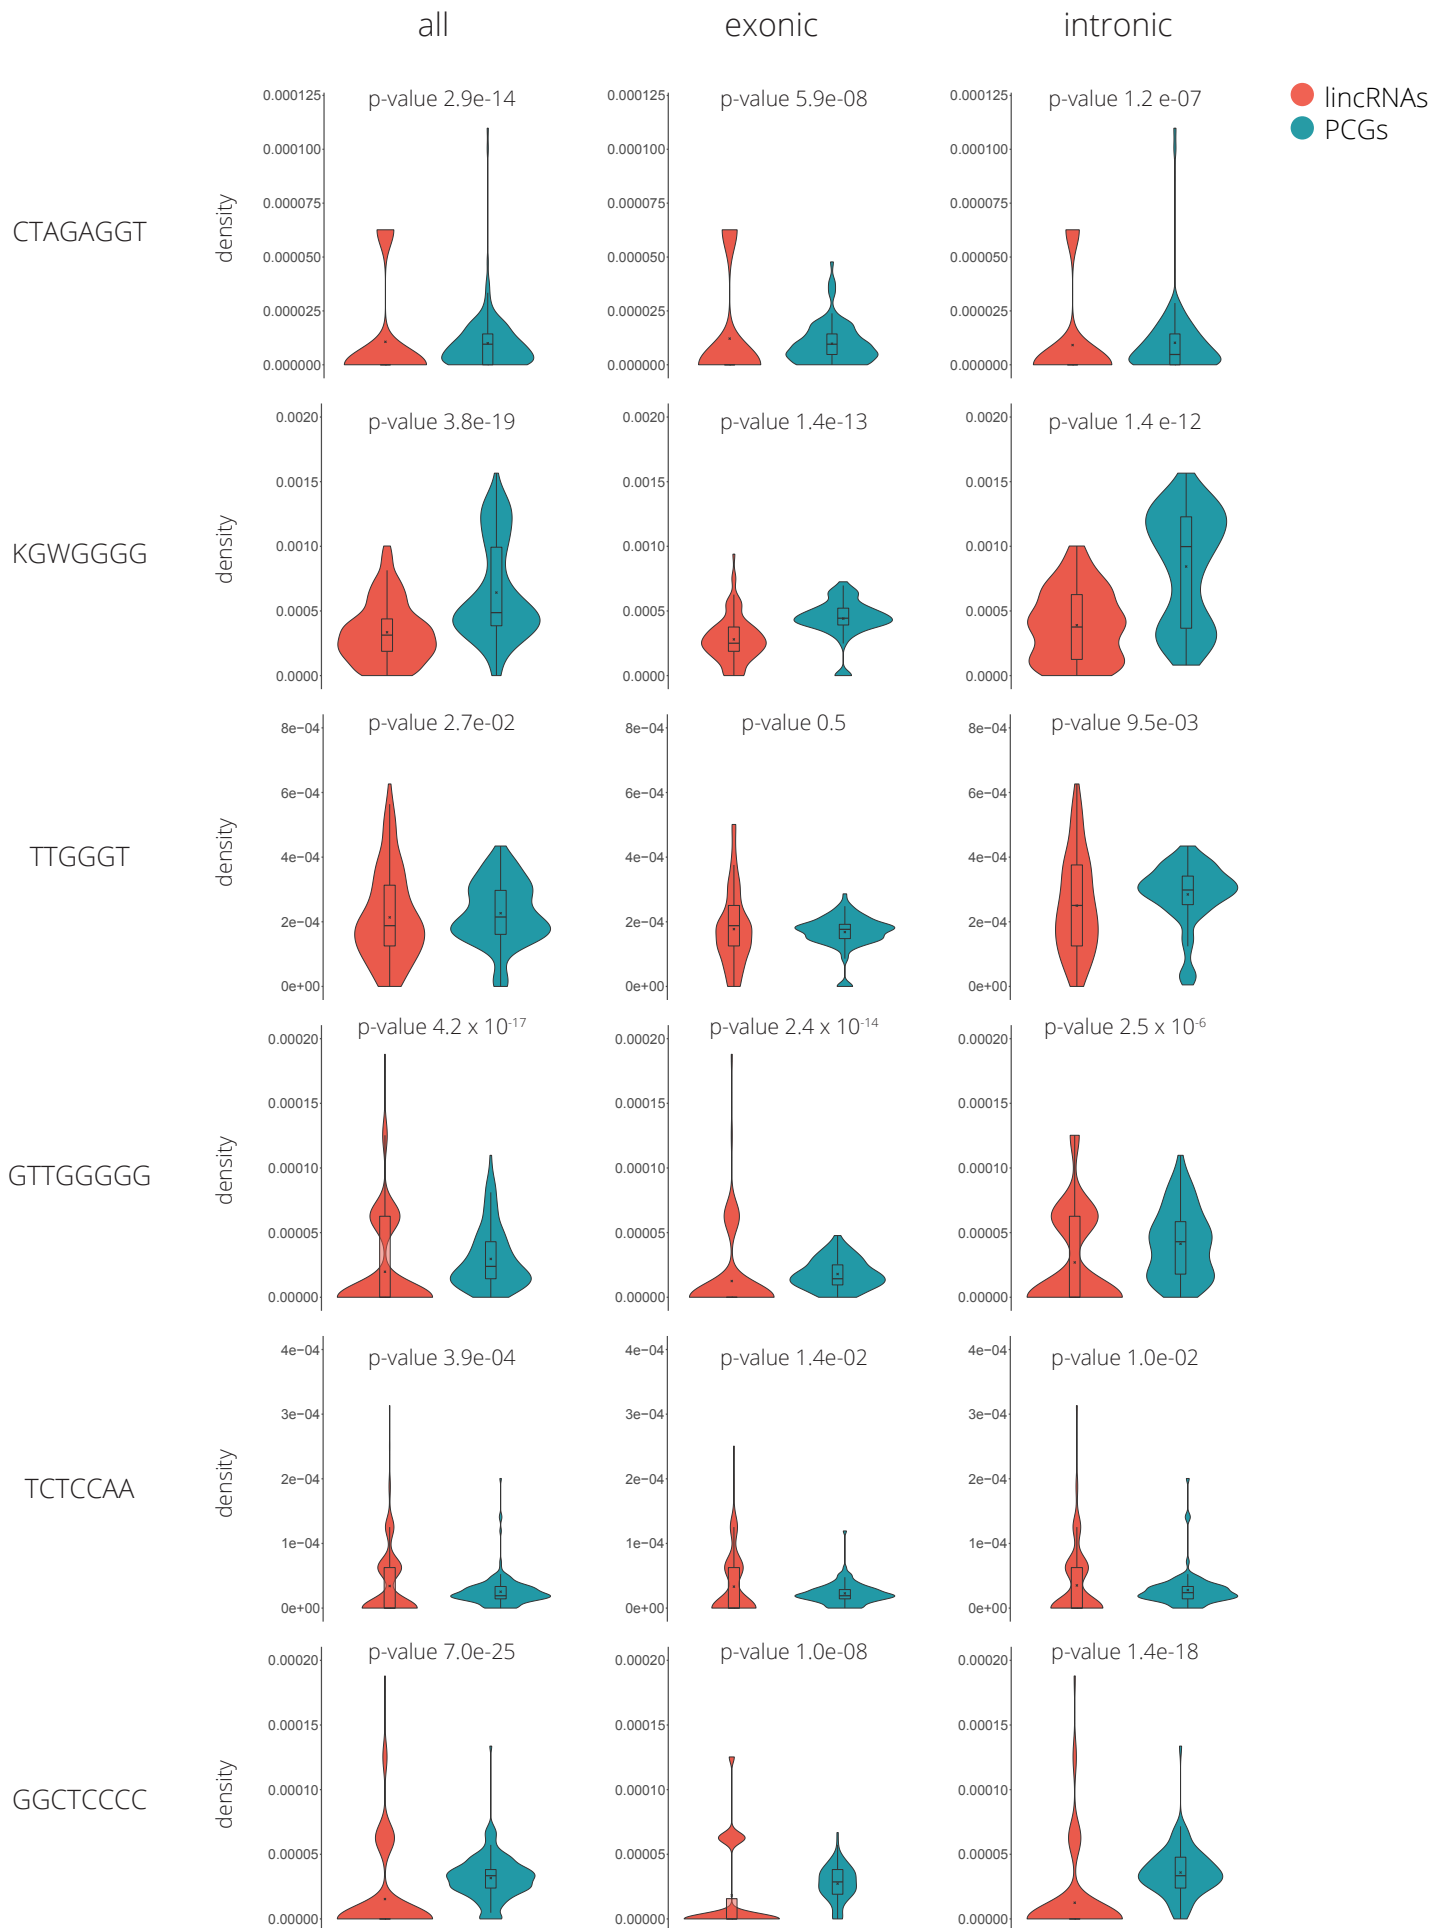

**Figure S13.** Splicing silencer motif distributions 100 nt upstream (intronic) and 100 nt downstream (exonic) of 3'ss in lincRNAs and PCGs. Motifs taken from Sironi et al. (2004). P-values are calculated by Wilcoxon rank sum test.

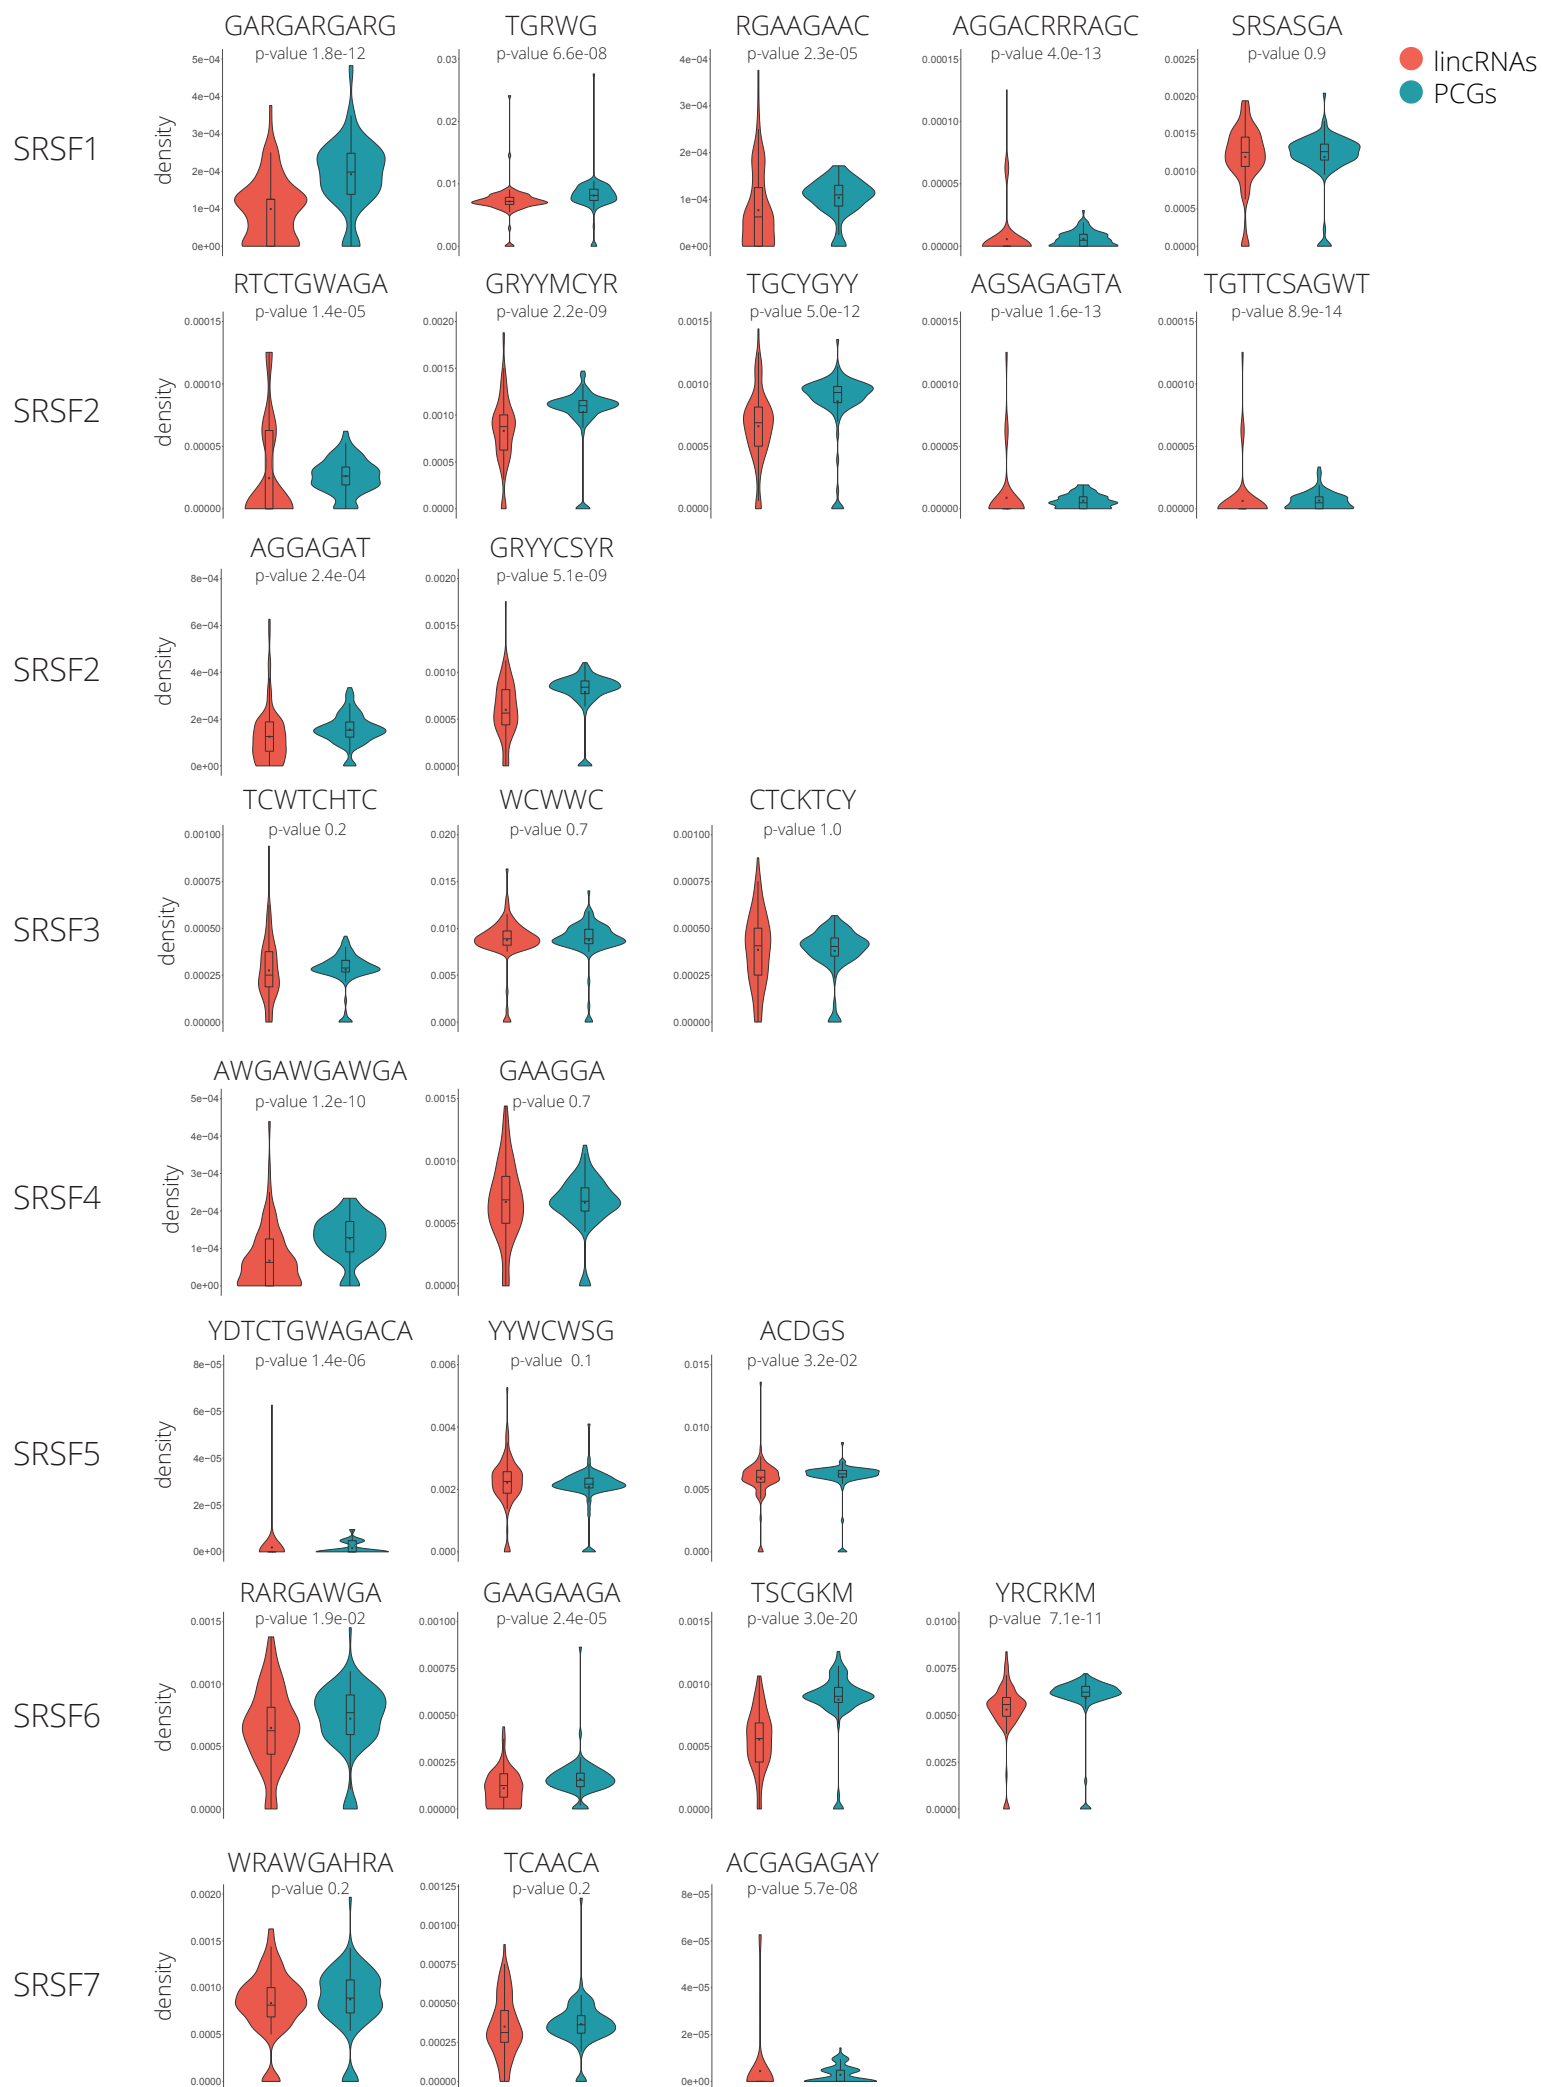

**Figure S14.** SRSF binding motif distributions in lincRNAs and PCGs 100 nt upstream of 5'ss. References for motifs are provided in Supplementary Data. P-values are calculated by Wilcoxon rank sum test. Two binding motifs of SRSF9 are not shown because no motifs were found in lincRNAs.

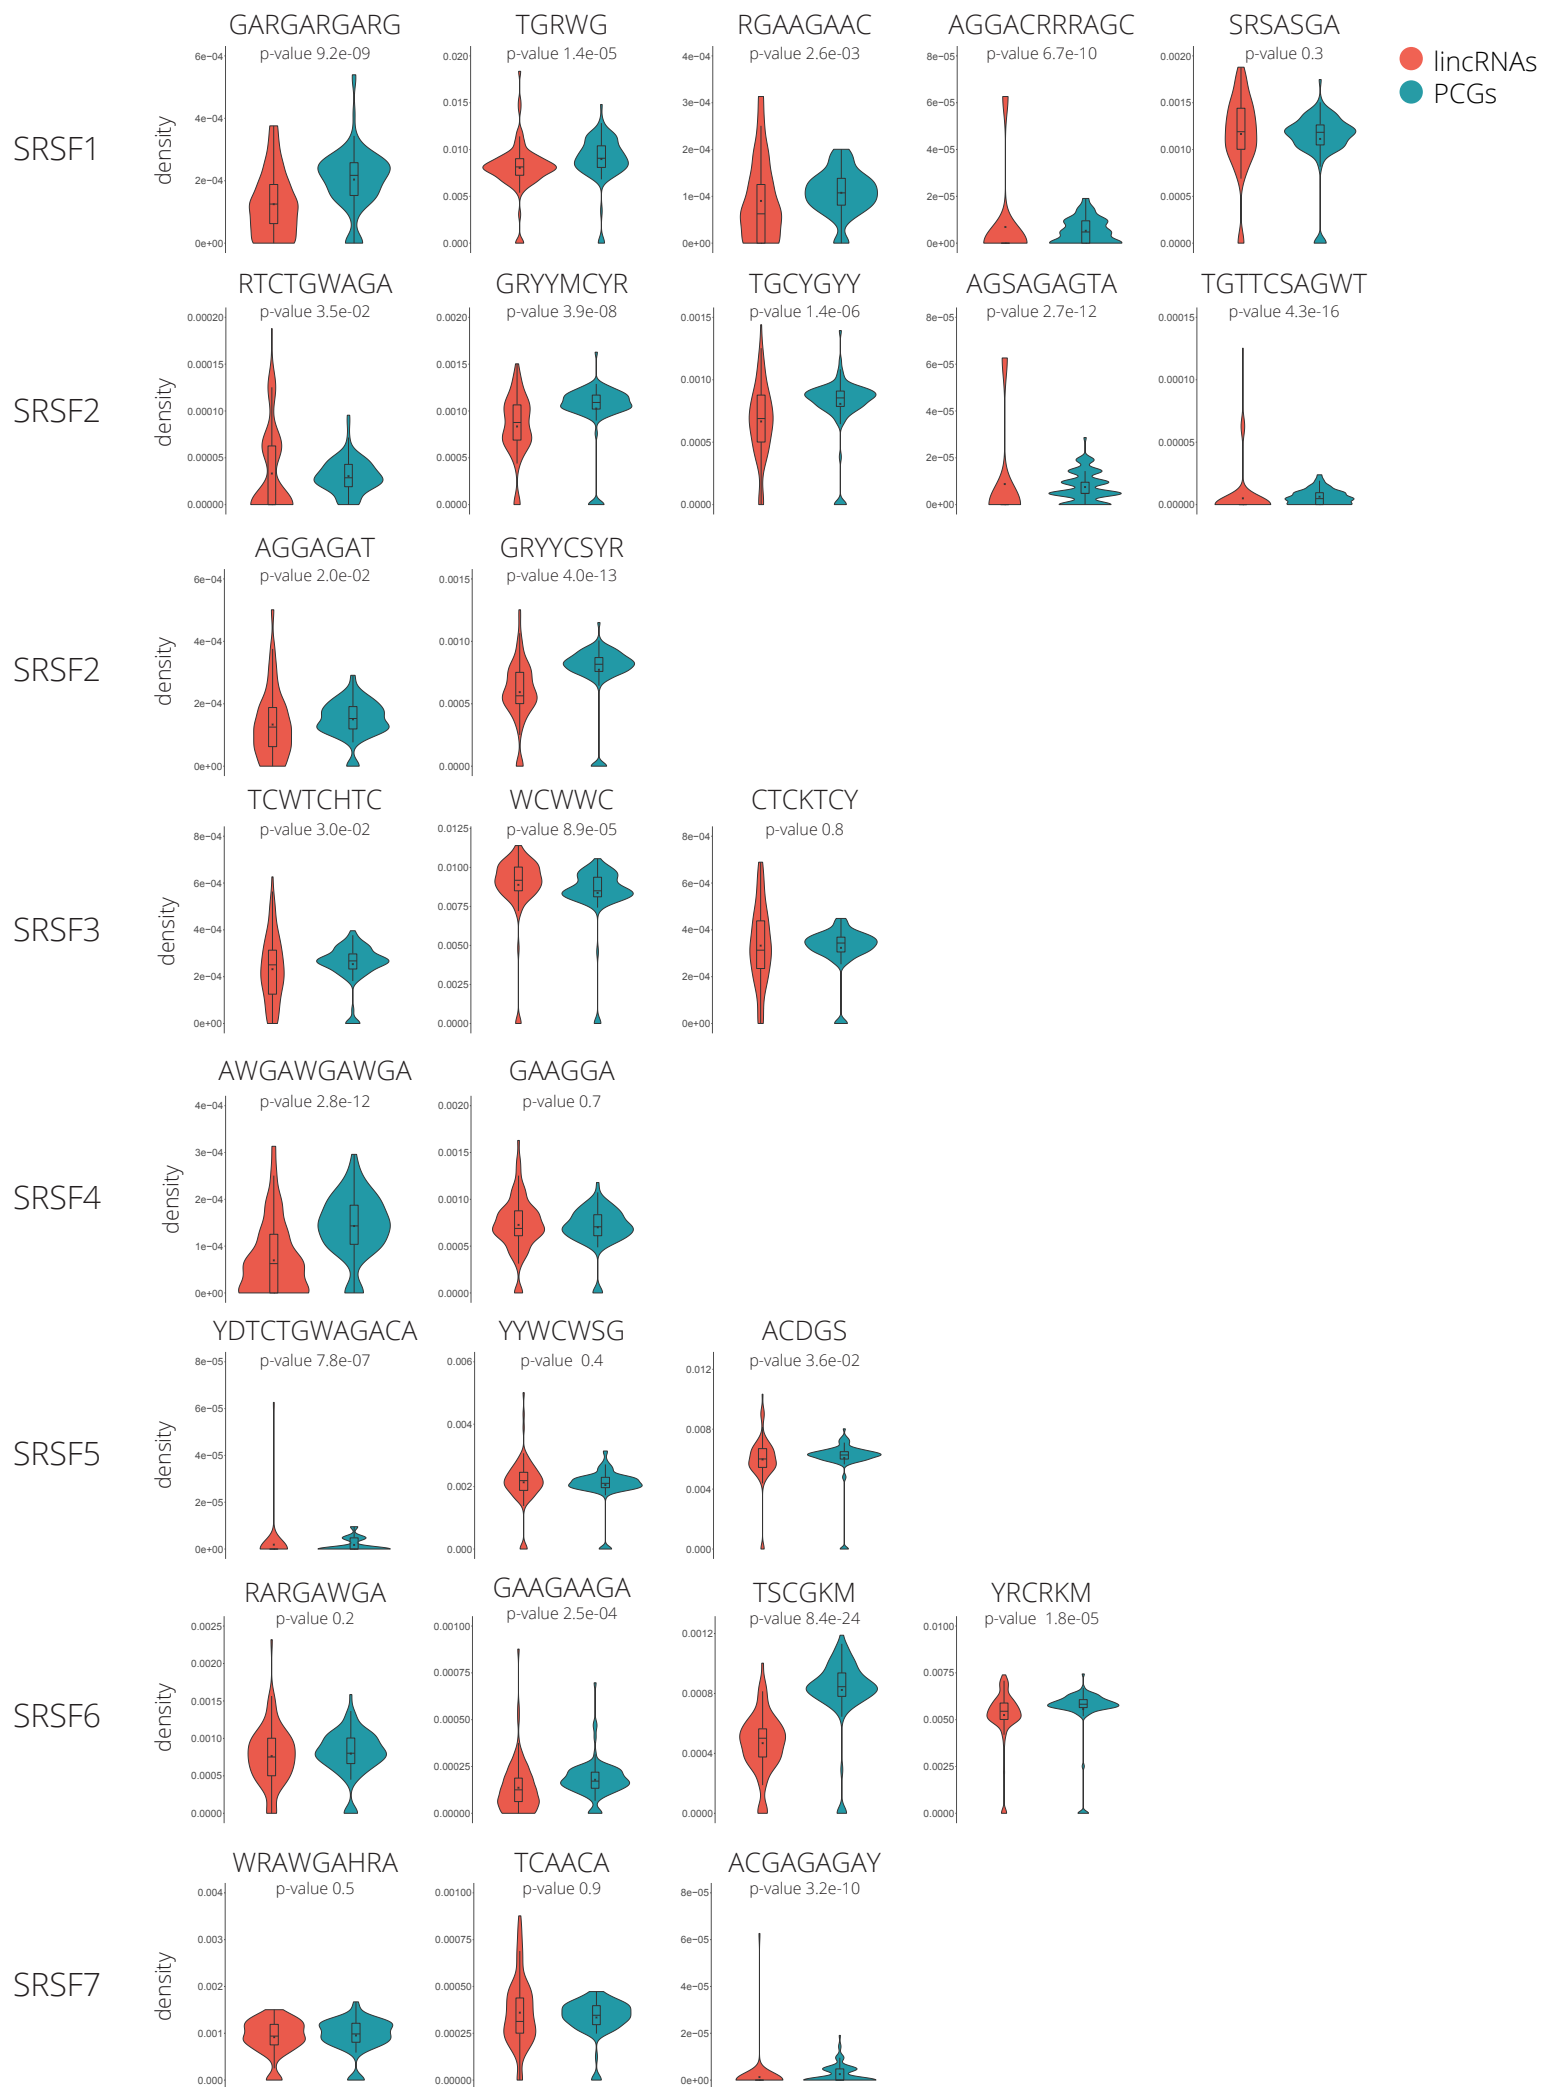

**Figure S15.** SRSF binding motif distributions in lincRNAs and PCGs 100 nt downstream of 3'ss. References for motifs are provided in Supplementary Data. P-values are calculated by Wilcoxon rank sum test. Two binding motifs of SRSF9 are not shown because no motifs were found in lincRNAs.



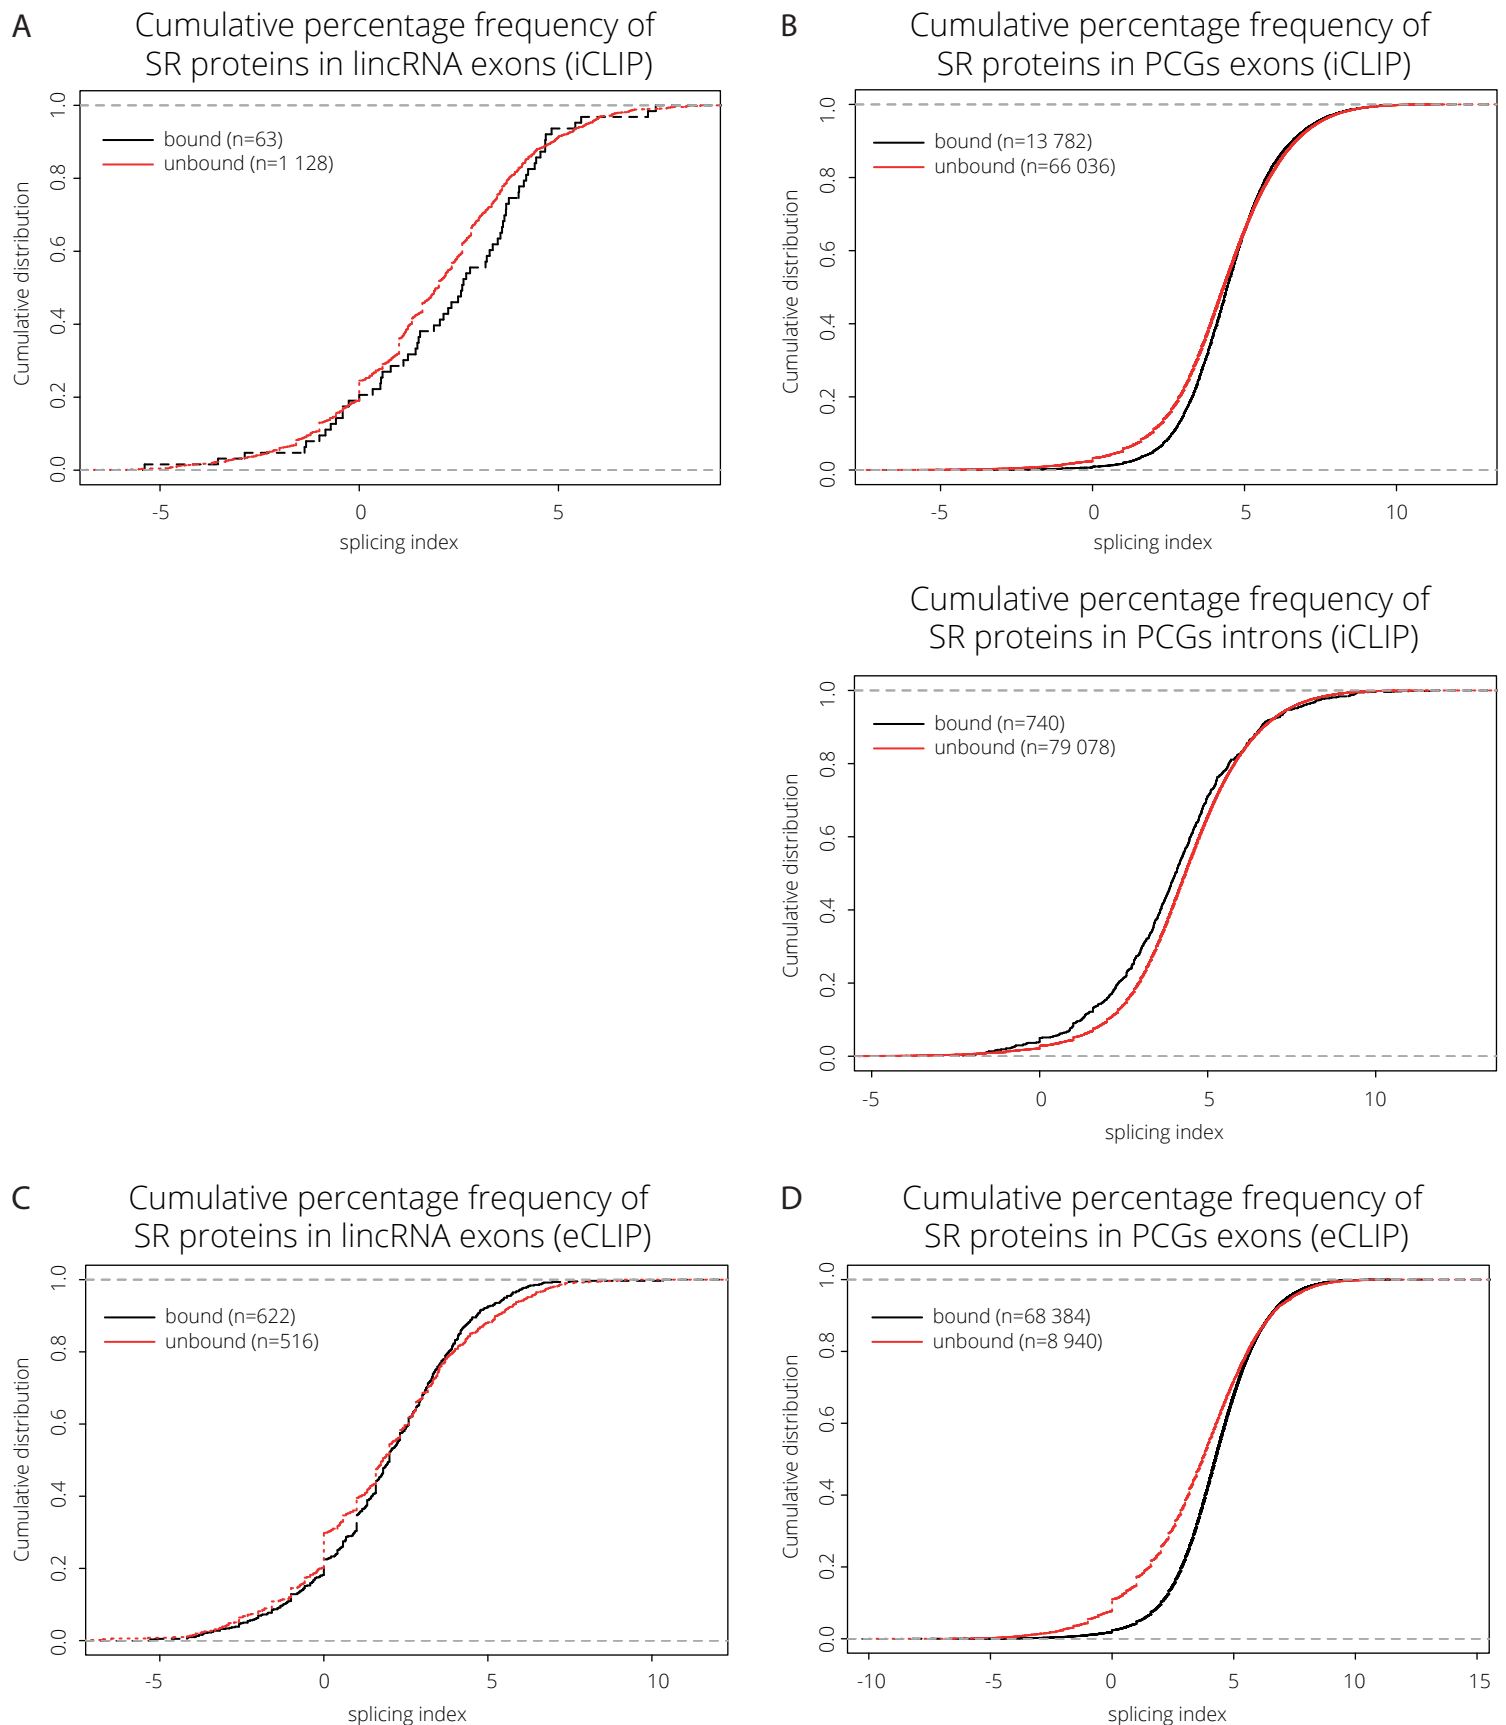

**Figure S16.** Cumulative distributions of splicing efficiencies comparing SRSF2, SRSF5 and SRSF6-bound and unbound lincRNAs (**A**) and PCGs (**B**) in exons (100 nt downstream of 3'ss) and introns (100 nt upstream of 3'ss). Cumulative distributions of splicing efficiencies comparing SRSF1, SRSF7 and SRSF9-bound and unbound lincRNAs (**C**) and PCGs (**D**) in exons (100 nt downstream of 3'ss); n = number of genes.

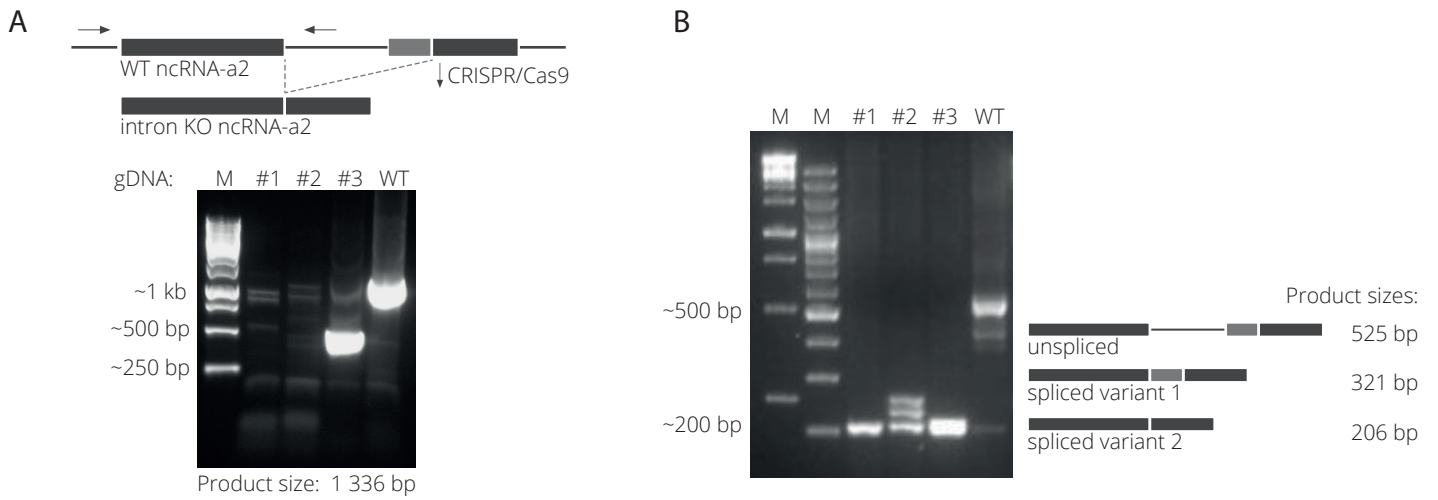

**Figure S17.** NcRNA-a2 intron KOs. **(A)** Intron retention assay of ncRNA-a2; horizontal arrows - primers, M - marker. Unspecific products caused by mispriming in lanes 2-4 were confirmed to be unspecific by cloning into plasmid vectors and sequencing. **(B)** RT-PCR analysis of ncRNA-a2 in three selected intron KO cell lines.

## Supplementary List of Primers

### Primers for Quantitative PCR – Splicing Efficiency in Fractions

| <u>Target</u>              | <u>sequence</u>                                                |
|----------------------------|----------------------------------------------------------------|
| ncRNA-a2 spliced variant 1 | 5'- CTCATTCGGTCCATCCAAC - 3'<br>5'- ACCTGGAGCCCCGGAAGGAAC - 3' |
| ncRNA-a2 spliced variant 2 | 5'- CTCATTCGGTCCATCCAAC - 3'<br>5'- GCACTGGAGACGGAAGGAAC - 3'  |
| ncRNA-a2 unspliced         | 5'- CTCATTCGGTCCATCCAAC - 3'<br>5'- GGAGGGGAGGGAGGAAGT - 3'    |
| ncRNA-a5 spliced           | 5'- CAGGTCAGGTCCTCTGGGTA - 3'<br>5'- CATCCCTTTCCTGGGGTAGT - 3' |
| ncRNA-a5 unspliced         | 5'- GCTTGAGTCCTCCCAAGGTT - 3'<br>5'- CATCCCTTTCCTGGGGTAGT - 3' |
| GAPDH spliced              | 5'- ACATCGCTCAGACACCATGG - 3'<br>5'- GTTAAAAGCAGCCCTGGTGA - 3' |
| GAPDH unspliced            | 5'- CAGGGAAGCTCAAGGGAGAT - 3'<br>5'- GTTAAAAGCAGCCCTGGTGA - 3' |
| LDHA spliced               | 5'- TGGCAGCCTTTTCCTTAGAA - 3'<br>5'- CTTTCTCCCTCTTGCTGACG - 3' |
| LDHA unspliced             | 5'- TGGCAGCCTTTTCCTTAGAA - 3'<br>5'- TGTGCAACTGCACTCTACCC - 3' |

### Primers for Semiquantitative PCR

| <u>Target</u> | <u>sequence</u>                                               |
|---------------|---------------------------------------------------------------|
| ncRNA-a2 semi | 5'- CTCATTCGGTCCATCCAAC - 3'<br>5'- TGATGGCATTGAATTGGAGA - 3' |

### Primers for Quantitative PCR – Intron Swap

| <u>Target</u>              | <u>sequence</u>                                                |
|----------------------------|----------------------------------------------------------------|
| MID3-4 RT                  | 5'- CTACAGTGCTGAGTGCGTCT - 3'                                  |
| ncRNA-a2 spliced variant 1 | 5'- CTCATTCGGTCCATCCAAC - 3'<br>5'- ACCTGGAGCCCCGGAAGGAAC - 3' |
| ncRNA-a2 spliced variant 2 | 5'- CTCATTCGGTCCATCCAAC - 3'<br>5'- GCACTGGAGACGGAAGGAAC - 3'  |
| ncRNA-a2 unspliced         | 5'- CTGCCGGGTTGCAAACCTTG - 3'<br>5'- TGGTAGAAGCACGAGCAAGG - 3' |
| ncRNA-a2 MID3/4            | 5'- GTGCCCTGGAATGTTTGCTG - 3'                                  |

|               |                                 |
|---------------|---------------------------------|
| HBB spliced   | 5'- AGTGCTGAGTGCGTCTCTGA - 3'   |
|               | 5'- TTGGACCCAGAGGTTCTTTG - 3'   |
| HBB unspliced | 5'- TGCCCAGGAGCCTGAAGTTC - 3'   |
|               | 5'- TAGCAGCTACAATCCAGCTACC - 3' |
| HBB total     | 5'- CACACAGACCAGCACGTTG - 3'    |
|               | 5'- TTGGACCCAGAGGTTCTTTG - 3'   |
|               | 5'- CCTGAAGTTCTCAGGATCCA - 3'   |

### Primers for Quantitative PCR – Splicing Efficiency of All 2NcRNA-a2 Mutants

| <u>Target</u>              | <u>sequence</u>                |
|----------------------------|--------------------------------|
| MID3-4 RT                  | 5'- CTACAGTGCTGAGTGCGTCT - 3'  |
| ncRNA-a2 spliced variant 1 | 5'- CTCATTCGGTCCATCCAAC - 3'   |
|                            | 5'- ACCTGGAGCCCCGGAAGGAAC - 3' |
| ncRNA-a2 spliced variant 2 | 5'- CTCATTCGGTCCATCCAAC - 3'   |
|                            | 5'- GCACTGGAGACGGAAGGAAC - 3'  |
| ncRNA-a2 MID3/4            | 5'- GTGCCCTGGAATGTTTGCTG - 3'  |
|                            | 5'- AGTGCTGAGTGCGTCTCTGA - 3'  |

### Primers for Quantitative PCR – Splicing Efficiency after hnRNP H siRNA KD

| <u>Target</u>              | <u>sequence</u>                |
|----------------------------|--------------------------------|
| ncRNA-a2 spliced variant 1 | 5'- CTCATTCGGTCCATCCAAC - 3'   |
|                            | 5'- ACCTGGAGCCCCGGAAGGAAC - 3' |
| ncRNA-a2 spliced variant 2 | 5'- CTCATTCGGTCCATCCAAC - 3'   |
|                            | 5'- GCACTGGAGACGGAAGGAAC - 3'  |
| ncRNA-a2 unspliced 2       | 5'- CTGCCGGGTTGCAAAC - 3'      |
|                            | 5'- TGGTAGAAGCACGAGCAAGG - 3'  |
| GAPDH unspliced            | 5'- CAGGGAAGCTCAAGGGAGAT - 3'  |
|                            | 5'- GTTAAAAGCAGCCCTGGTGA - 3'  |
| UBB                        | 5'- GCTTTGTTGGGTGAGCTTGT - 3'  |
|                            | 5'- TCACGAAGATCTGCATTTTGA - 3' |

### Primers for Quantitative PCR – Splicing Efficiency of other LincRNAs

| <u>Target</u>     | <u>sequence</u>               |
|-------------------|-------------------------------|
| MID5-6 RT         | 5'- CTCGCGATATCGTGTCTGAT - 3' |
| SNHG8 spliced     | 5'- TTAGGTGAAAGTCGCCGGGC - 3' |
|                   | 5'- TCAAAC - 3'               |
| SNHG8 unspliced   | 5'- GGCTTTGGAAACCTTAAGT - 3'  |
|                   | 5'- TCAAAC - 3'               |
| BX088651.4spliced | 5'- GAAAGCTCAGACTCAGGGCC - 3' |
|                   | 5'- AAGCACTAGACTGCGCACGC - 3' |

|                      |                                                              |
|----------------------|--------------------------------------------------------------|
| BX088651.4unspliced  | 5'- GAAAGCTCAGACTCAGGGCC- 3'<br>5'- AAAACCAGAGGCGGTGGAAG- 3' |
| BX005266.2spliced    | 5'- GAAAGCTCAGACTCAGGGCC- 3'<br>5'- GGATCGAGATCTGCGCACGC- 3' |
| BX005266.2unspliced  | 5'- GAAAGCTCAGACTCAGGGCC- 3'<br>5'- AAAACCAGAGGCGGTGGAAG- 3' |
| AC005840.2 spliced   | 5'- TGGCAAGTTTACCACCCTGA- 3'<br>5'- ACAGTGCTTCCGTCCTCATG- 3' |
| AC005840.2 unspliced | 5'- TGGCAAGTTTACCACCCTGA- 3'<br>5'- GAAAGCAGCCATCCCCTTAC- 3' |
| AC116021.1spliced    | 5'- CGAGCTCTTGAAACCCGGG- 3'<br>5'- GGGTTGACATGAGGATGGCA- 3'  |
| AC116021.1unspliced  | 5'- CTTTGCAGGCAACAACCCTC- 3'<br>5'- GGGTTGACATGAGGATGGCA- 3' |

### Primers for Quantitative PCR – Splicing Efficiency of NcRNA-a2 with HBB PPT

| <u>Target</u>              | <u>sequence</u>                                                |
|----------------------------|----------------------------------------------------------------|
| MID3-4 RT                  | 5'- CTACAGTGCTGAGTGCGTCT - 3'                                  |
| ncRNA-a2 spliced variant 1 | 5'- CTCATTTCGGTCCATCCAAC - 3'<br>5'- ACCTGGAGCCCCGAAGGAAC - 3' |
| ncRNA-a2 spliced variant 2 | 5'- CTCATTTCGGTCCATCCAAC - 3'<br>5'- GCACTGGAGACGGAAGGAAC - 3' |
| ncRNA-a2 MID3/4            | 5'- GTGCCCTGGAATGTTTGCTG - 3'<br>5'- AGTGCTGAGTGCGTCTCTGA - 3' |

### Primers for Quantitative PCR – U2AF2 RIP

| <u>Target</u>        | <u>sequence</u>                                                |
|----------------------|----------------------------------------------------------------|
| MID3-4 RT            | 5'- CTACAGTGCTGAGTGCGTCT - 3'                                  |
| ncRNA-a2 unspliced 2 | 5'- CTGCCGGGTTGCAAACCTTG- 3'<br>5'- TGGTAGAAGCACGAGCAAGG - 3'  |
| ncRNA-a2 MID3/4      | 5'- GTGCCCTGGAATGTTTGCTG - 3'<br>5'- AGTGCTGAGTGCGTCTCTGA - 3' |

### Primers for Quantitative PCR – siRNA KDs of LncRNA-as

| <u>Target</u> | <u>sequence</u>                                                |
|---------------|----------------------------------------------------------------|
| ncRNA-a2      | 5'- CTCATTTCGGTCCATCCAAC - 3'<br>5'- TGGTAGAAGCACGAGCAAGG - 3' |
| KDM5B         | 5'- TCAGTGCAGAGAGCCAGAGA - 3'<br>5'- GGATAGATCGGCCTCGTGTA - 3' |

|          |                                                                 |
|----------|-----------------------------------------------------------------|
| RAB1F    | 5'- AGGGACCGCTCTTCTCTC - 3'<br>5'- AGTGTTCTGGAGGAGATCG - 3'     |
| ADIPOR1  | 5'- ACATCTGGACCCATCTGCTT - 3'<br>5'- CCCAAAACCACCTTCTCCT - 3'   |
| KLHL12   | 5'- TCAAGTGCACGAAATTCAG - 3'<br>5'- GCTCTTTCTTGGCATGCTTC - 3'   |
| GAPDH    | 5'- ACATCGCTCAGACACCATGG - 3'<br>5'- GTTAAAAGCAGCCCTGGTGA - 3'  |
| LDHA     | 5'- TGGCAGCCTTTTCCTTAGAA - 3'<br>5'- CTTTCTCCCTCTTGCTGACG - 3'  |
| ACTB     | 5'- GGCATCCTCACCTGAAGTA - 3'<br>5'- AGGTGTGGTGCCAGATTTTC - 3'   |
| UBB      | 5'- GCTTTGTTGGGTGAGCTTGT - 3'<br>5'- TCACGAAGATCTGCATTTTGA - 3' |
| ncRNA-a5 | 5'- CAGGTCAGGTCCTCTGGGTA - 3'<br>5'- CATCCCTTCTGGGGTAGT - 3'    |
| PQLC3    | 5'- CCTCAGCCTTCCGAGTTTAC - 3'<br>5'- GAGGATGGGGTACTCCAGGT - 3'  |
| E2F6     | 5'- AGGAATGGGCTCCAGAGAGA - 3'<br>5'- TCGGACTCCCAGTTTCGTTG - 3'  |
| ROCK2    | 5'- TGAAGCCTGACAACATGCTC - 3'<br>5'- AATCCGGTGTCCAAGTCT - 3'    |
| GAPDH    | 5'- ACATCGCTCAGACACCATGG - 3'<br>5'- GTTAAAAGCAGCCCTGGTGA - 3'  |

### Primers for Quantitative PCR – Ectopic Overexpression

| <u>Target</u> | <u>sequence</u>                                                    |
|---------------|--------------------------------------------------------------------|
| ncRNA-a2      | 5'- CCTTACTCTTGGACAACACTCC - 3'<br>5'- TTGGATGGACCGAATGAGGATG - 3' |
| KLHL12        | 5'- ACAAGCCTGCTGTGAGTTCT - 3'<br>5'- TCCACCTCTCCTTGACTCAGA - 3'    |
| GAPDH         | 5'- ATTTGGTTCGTATTGGGCGCC - 3'<br>5'- TGAGGTCAATGAAGGGTCA - 3'     |

### Primers for Genotyping CRISPR Mutants

| <u>Target</u>      | <u>sequence</u>                                                           |
|--------------------|---------------------------------------------------------------------------|
| ncRNA-a2 intron KO | 5'- GGGGGTGGGTATAGAGGAATTTGATGC - 3'<br>5'- GCGGACCCTACACGTGCGCTACGT - 3' |
| ncRNA-a2 semi      | 5'- CTCATTCGGTCCATCCAAGT - 3'<br>5'- TGATGGCATTGAATTGGAGA - 3'            |

## Primers for Quantitative PCR – NcRNA-a2 Intron KOs

| <u>Target</u> | <u>sequence</u>                                                    |
|---------------|--------------------------------------------------------------------|
| ncRNA-a2      | 5'- CCTTACTCTTGGACAACACTCC - 3'<br>5'- TTGGATGGACCGAATGAGGATG - 3' |
| KDM5B         | 5'- TCAGTGCAGAGAGCCAGAGA - 3'<br>5'- GGATAGATCGGCCTCGTGTA - 3'     |
| RAB1F         | 5'- AGGGACCGCTCTTCTCTC - 3'<br>5'- AGTGTTCTTGAGGAGATCG - 3'        |
| ADIPOR1       | 5'- ACATCTGGACCCATCTGCTT - 3'<br>5'- CCCAAAACACCTTCTCCT - 3'       |
| KLHL12        | 5'- ACAAGCCTGCTGTGAGTTCT - 3'<br>5'- TCCACCTCTCCTTGACTCAGA - 3'    |
| GAPDH         | 5'- ATTTGGTCGTATTGGGCGCC - 3'<br>5'- TGAGGTCAATGAAGGGTCA - 3'      |

## Supplementary List of Used ISE Motifs

| <u>Name of the mutant</u> | <u>sequence</u> ( <i>mutated nucleotides are underlined</i> ) |
|---------------------------|---------------------------------------------------------------|
| 1xISE                     | 5'- TTTGGGC - 3'                                              |
| 2xISE                     | 5'- TTTGGGCTATTGG - 3'                                        |
| 3xISE                     | 5'- TTTGGGCTTTGGGCTATTGG - 3'                                 |
| ISEctrl                   | 5'- TTC <u>G</u> C <u>G</u> C - 3'                            |



## Supplementary List of Modified PPTs

| <u>Name of the mutant</u> | <u>sequence (mutated nucleotides are underlined)</u>                                                                                                                                |
|---------------------------|-------------------------------------------------------------------------------------------------------------------------------------------------------------------------------------|
| ncRNAa-2 WT               | 5'- TCGCCGCCTCTGACAACCTTTT - 3'                                                                                                                                                     |
| ncRNAa-2 T21              | 5'- <u>TTTTTTTTTTT</u> <u>TTTTTTTTTTT</u> - 3'                                                                                                                                      |
| ncRNAa-2 CtoT             | 5'- <u>T</u> <u>I</u> <u>G</u> <u>T</u> <u>I</u> <u>G</u> <u>I</u> <u>T</u> <u>T</u> <u>I</u> <u>G</u> <u>A</u> <u>T</u> <u>A</u> <u>A</u> <u>I</u> <u>T</u> <u>T</u> <u>T</u> - 3' |
| ncRNAa-2 GAtot            | 5'- <u>T</u> <u>C</u> <u>I</u> <u>C</u> <u>C</u> <u>I</u> <u>C</u> <u>C</u> <u>T</u> <u>C</u> <u>T</u> <u>I</u> <u>C</u> <u>I</u> <u>C</u> <u>T</u> <u>T</u> <u>T</u> - 3'          |
| SNHG8 WT                  | 5'- GCATGCGCGGACTTGAGTGCTCAT - 3'                                                                                                                                                   |
| SNHG8 T25                 | 5'- <u>TTTTTTTTTTTTTTTTTTTTTTTTTTTT</u> - 3'                                                                                                                                        |
| BX088651.4 WT             | 5'- CATCGCGTCCTCTTC - 3'                                                                                                                                                            |
| BX088651.4 T15            | 5'- <u>TTTTTTTTTTTTTTTT</u> - 3'                                                                                                                                                    |
| BX005266.2 WT             | 5'- CATCGCGTCCTCTTCCAGTCTAGTGCTTTTTT - 3'                                                                                                                                           |
| BX005266.2 T32            | 5'- <u>TTTTTTTTTTTTTTTTTTTTTTTTTTTTTTTTTTTT</u> - 3'                                                                                                                                |
| AC005840.2 WT             | 5'- GAGACTCACTCTAGTCTTTTCCCG - 3'                                                                                                                                                   |
| AC005840.2 T24            | 5'- <u>TTTTTTTTTTTTTTTTTTTTTTTT</u> - 3'                                                                                                                                            |
| AC116021.1 WT             | 5'- TCCCTATTTTG - 3'                                                                                                                                                                |
| AC116021.1 T11            | 5'- <u>TTTTTTTTTT</u> - 3'                                                                                                                                                          |

## Supplementary List of MaxEnt Scores

| Name of the mutant                | 5'ss      |              | 3'ss                     |              |
|-----------------------------------|-----------|--------------|--------------------------|--------------|
|                                   | sequence  | MaxEnt score | sequence                 | MaxEnt score |
| ncRNA-a2                          | CCGgtaacc | 5.28         | cgctctgacaacttttcagGGC   | 6.13         |
|                                   |           |              | gatcctctcgtctccccagTCT   | 9.31         |
| ncRNA-a5 intron 2                 | GAGgtaagc | 9.85         | ttgagatccttcttttcagGTG   | 9.33         |
| GAPDH intron 2                    | CGGgtgagt | 9.89         | accctcacgtattccccagGTT   | 8.32         |
| LDHA intron 3                     | AAGgttgat | 4.19         | attattcccccttttctctagACT | 8.08         |
| ncRNA-a2 HBB intron               | CCGgtgagt | 10.90        | ctcttatcttctccacagGGC    | 12.56        |
| ncRNA-a2 HBB intron ncRNA-a2 5'ss | CCGgtaacc | 5.28         | ctcttatcttctccacagGGC    | 12.56        |
| HBB WT intron 2                   | AGGgtgagt | 9.25         | ctcttatcttctccacagCTC    | 11.43        |
| HBB ncRNA-a2 intron               | AGGgtaacc | 5.40         | cgctctgacaacttttcagCTC   | 4.97         |
| HBB ncRNA-a2 intron HBB 5'ss      | AGGgtgagt | 9.25         | cgctctgacaacttttcagCTC   | 4.97         |
| ncRNA-a2 FΔ1=Δ1                   | CCGgtaacg | 7.34         | cgctctgacaacttttcagGGC   | 6.13         |
|                                   |           |              | gatcctctcgtctccccagTCT   | 9.31         |
| ncRNA-a2 FΔ2                      | CCGgtaacg | 7.34         | cgctctgacaacttttcagGGC   | 6.13         |
|                                   |           |              | gatcctctcgtctccccagTCT   | 9.31         |
| ncRNA-a2 FΔ3                      | CCGgtaacc | 5.28         | cgctctgacaacttttcagGGC   | 6.13         |
|                                   |           |              | gatcctctcgtctccccagTCT   | 9.31         |
| ncRNA-a2 FΔ4                      | CCGgtaaca | 5.92         | cgctctgacaacttttcagGGC   | 6.13         |
|                                   |           |              | gatcctctcgtctccccagTCT   | 9.31         |
| ncRNA-a2 FΔ5                      | CCGgtaact | 6.39         | cgctctgacaacttttcagGGC   | 6.13         |
|                                   |           |              | gatcctctcgtctccccagTCT   | 9.31         |
| ncRNA-a2 FΔ6                      | CCGgtaaca | 5.92         | cgctctgacaacttttcagGGC   | 6.13         |
|                                   |           |              | gatcctctcgtctccccagTCT   | 9.31         |
| ncRNA-a2 FΔ7                      | CCGgtaaca | 5.92         | cgctctgacaacttttcagGGC   | 6.13         |
|                                   |           |              | gatcctctcgtctccccagTCT   | 9.31         |
| ncRNA-a2 FΔ8                      | CCGgtaacc | 5.28         | cgctctgacaacttttcagGGC   | 6.13         |
|                                   |           |              | gatcctctcgtctccccagTCT   | 9.31         |
| ncRNA-a2 RΔ1=Δ8                   | CCGgtaacc | 5.28         | cgctctgacaacttttcagGGC   | 6.13         |
|                                   |           |              | gatcctctcgtctccccagTCT   | 9.31         |

|                         |           |       |                                                  |              |
|-------------------------|-----------|-------|--------------------------------------------------|--------------|
| ncRNA-a2 RΔ2            | CCGgtaacc | 5.28  | cgctctgacaacttttcagGGC<br>gatcctctcgtctccccagTCT | 6.13<br>9.31 |
| ncRNA-a2 RΔ3            | CCGgtaacc | 5.28  | cgctctgacaacttttcagGGC<br>gatcctctcgtctccccagTCT | 6.13<br>9.31 |
| ncRNA-a2 RΔ4            | CCGgtaacc | 5.28  | cgctctgacaacttttcagGGC<br>gatcctctcgtctccccagTCT | 6.13<br>9.31 |
| ncRNA-a2 RΔ5            | CCGgtaacc | 5.28  | cgctctgacaacttttcagGGC<br>gatcctctcgtctccccagTCT | 6.13<br>9.31 |
| ncRNA-a2 RΔ6            | CCGgtaacc | 5.28  | cgctctgacaacttttcagGGC<br>gatcctctcgtctccccagTCT | 6.13<br>9.31 |
| ncRNA-a2 RΔ7            | CCGgtaacc | 5.28  | cgctctgacaacttttcagGGC<br>gatcctctcgtctccccagTCT | 6.13<br>9.31 |
| ncRNA-a2 Δ2             | CCGgtaacc | 5.28  | cgctctgacaacttttcagGGC<br>gatcctctcgtctccccagTCT | 6.13<br>9.31 |
| ncRNA-a2 Δ3             | CCGgtaacc | 5.28  | cgctctgacaacttttcagGGC<br>gatcctctcgtctccccagTCT | 6.13<br>9.31 |
| ncRNA-a2 Δ4             | CCGgtaacc | 5.28  | cgctctgacaacttttcagGGC<br>gatcctctcgtctccccagTCT | 6.13<br>9.31 |
| ncRNA-a2 Δ5             | CCGgtaacc | 5.28  | cgctctgacaacttttcagGGC<br>gatcctctcgtctccccagTCT | 6.13<br>9.31 |
| ncRNA-a2 Δ6             | CCGgtaacc | 5.28  | cgctctgacaacttttcagGGC<br>gatcctctcgtctccccagTCT | 6.13<br>9.31 |
| ncRNA-a2 Δ7             | CCGgtaacc | 5.28  | cgctctgacaacttttcagGGC<br>gatcctctcgtctccccagTCT | 6.13<br>9.31 |
| ncRNA-a2 7.53 5'ss      | ACGgtaact | 7.53  | cgctctgacaacttttcagGGC<br>gatcctctcgtctccccagTCT | 6.13<br>9.31 |
| ncRNA-a2 9.6 5'ss       | CAGgtgagc | 9.6   | cgctctgacaacttttcagGGC<br>gatcctctcgtctccccagTCT | 6.13<br>9.31 |
| ncRNA-a2 11.08 5'ss     | CAGgtaagg | 11.08 | cgctctgacaacttttcagGGC<br>gatcctctcgtctccccagTCT | 6.13<br>9.31 |
| ncRNA-a2 FΔ1 7.66 5'ss  | CAGgtgacg | 7.66  | cgctctgacaacttttcagGGC<br>gatcctctcgtctccccagTCT | 6.13<br>9.31 |
| ncRNA-a2 FΔ1 9.35 5'ss  | CCGgtgagg | 9.35  | cgctctgacaacttttcagGGC<br>gatcctctcgtctccccagTCT | 6.13<br>9.31 |
| ncRNA-a2 FΔ1 11.08 5'ss | CAGgtaagg | 11.08 | cgctctgacaacttttcagGGC                           | 6.13         |

|                         |           |       |                         |       |
|-------------------------|-----------|-------|-------------------------|-------|
|                         |           |       | gatcctctcgtctccccagTCT  | 9.31  |
| ncRNA-a2 T21 7.53 5'ss  | ACGgtaact | 7.53  | ttttttttttttttcagGGC    | 13.12 |
|                         |           |       | gatcctctcgtctccccagTCT  | 9.31  |
| ncRNA-a2 T21 9.6 5'ss   | CAGgtgagc | 9.6   | ttttttttttttttcagGGC    | 13.12 |
|                         |           |       | gatcctctcgtctccccagTCT  | 9.31  |
| ncRNA-a2 T21 11.08 5'ss | CAGgtaagg | 11.08 | ttttttttttttttcagGGC    | 13.12 |
|                         |           |       | gatcctctcgtctccccagTCT  | 9.31  |
| ncRNA-a2 T21            | CCGgtaacc | 5.28  | ttttttttttttttcagGGC    | 13.12 |
| ncRNA-a2 CtoT           | CCGgtaacc | 5.28  | tgttttgataattttcagGGC   | 8.62  |
| ncRNA-a2 GAtot          | CCGgtaacc | 5.28  | ctcctcttctctttcagGGC    | 13.39 |
| ncRNA-a2 ΔPPT           | CCGgtaacc | 5.28  | tcgccgcctctgacaaccagGGC | 4.76  |
| ncRNA-a2 3xISE-T21      | CCGgtaacc | 5.28  | ttttttttttttttcagGGC    | 13.12 |
| ncRNA-a2 with HBB PPT   | CCGgtaacc | 5.28  | ctcttatcttctccacagGGC   | 12.56 |
| SNHG8 WT                | AAAgtagct | 7.99  | cggacttgagtgctcattagGTC | -0.49 |
| SNHG8 T25               | AAAgtagct | 7.99  | tttttttttttttttagGTC    | 13.77 |
| BX088651.4 WT           | CAGgtaaag | 9.65  | tccatcgcgtcctctccagTCT  | 8.29  |
| BX088651.4 T15          | CAGgtaaag | 9.65  | tctttttttttttttcagTCT   | 10.63 |
| BX005266.2 WT           | CAGgtaaag | 9.65  | agtctagtgtttttccagATC   | 5.60  |
| BX005266.2 T32          | CAGgtaaag | 9.65  | ttttttttttttttccagATC   | 12.67 |
| AC005840.2 WT           | ACGgtaagg | 10.38 | actctagtctttcccagGAA    | 9.46  |
| AC005840.2 T24          | ACGgtaagg | 10.38 | ttttttttttttttcagGAA    | 13.15 |
| AC116021.1 WT           | TTGgtaaaa | 3.23  | ttatcatccctattttgcagGAA | 10.48 |
| AC116021.1 T11          | TTGgtaaaa | 3.23  | ttatcattttttttttcagGAA  | 12.22 |

## Supplementary List of Intron Sequences

| <u>Name</u>                               | <u>Sequence</u>                                                                                                                                                                                                                                                                                                                                                                                                                                                                                                                                                                                                                                                                                                                                                                                                                                                                                          | <u>Length (n)</u> |
|-------------------------------------------|----------------------------------------------------------------------------------------------------------------------------------------------------------------------------------------------------------------------------------------------------------------------------------------------------------------------------------------------------------------------------------------------------------------------------------------------------------------------------------------------------------------------------------------------------------------------------------------------------------------------------------------------------------------------------------------------------------------------------------------------------------------------------------------------------------------------------------------------------------------------------------------------------------|-------------------|
| ncRNA-a2 intron                           | 5'- gtaaccgcttgcaagaccacgctgccgggtgcaaactggggggacttcctccctccct<br>ccccctgggcgccgtgcaactgccctgggaccgggttctgggatgaggggggcagaccggg<br>ctcccagcggccggcgagcacgtagcgacgtgtaggggtccgctccccaccccctcgccg<br>cctctgacaacttttcag - 3'                                                                                                                                                                                                                                                                                                                                                                                                                                                                                                                                                                                                                                                                               | 204               |
| ncRNA-a2 HBB<br>intron 2 ncRNA-a2<br>5'ss | 5'- gtaaccgcatgggacgcttgatgttttcttccccttctttctatggttaagttcatgtcatagga<br>aggggataagtaacagggtacagtttagaatgggaaacagacgaatgattgcatcagtg<br>gaagtctcaggatcgttttagtttctttatttgctgttcataacaattgtttctttgttaattct<br>gctttcttttttcttccgcaattttactattatacttaatgccttaacattgtgtataaaaa<br>aggaaatatctctgagatacattaagtaacttaaaaaaaaaactttacacagtctgcctagtac<br>attactatttggaaatatgtgtgcttatttgcataattcataatctcctactttattttctttat<br>aattgatacataatcattatacatatttatgggttaaagtgaatgttttaatatgtgtacacata<br>ttgaccaaaccagggttaatttgcatttgaattttaaaaaatgctttcttttaataacttttt<br>gtttatcttatttctaatactttcctaactctttctttcagggcaataatgatacaatgtatcatg<br>cctctttgcaccattctaaagaataacagtgataatttctgggttaaggcaatagcaatatctct<br>gcatataaatatttctgataataattgtaactgatgtaagagggttcatattgctaatagcagc<br>tacaatccagctaccattctgcttttatttatggttgggataaggctggattattctgagtcaa<br>gctaggccctttgctaatacatgttcataaccttattcttctccacag - 3' | 850               |
| ncRNA-a2 intron<br>with HBB PPT           | 5'- gtaaccgcttgcaagaccacgctgccgggtgcaaactggggggacttcctccctccct<br>ccccctgggcgccgtgcaactgccctgggaccgggttctgggatgaggggggcagaccggg<br>ctcccagcggccggcgagcacgtagcgacgtgtaggggtccgctccccaccccctgttcat<br>acctcttattcttctccacag - 3'                                                                                                                                                                                                                                                                                                                                                                                                                                                                                                                                                                                                                                                                           | 209               |
| ncRNA-a2 HBB<br>5'ss                      | 5'- gtgagtgcgttgcaagaccacgctgccgggtgcaaactggggggacttcctccctccctc<br>cccctgggcgccgtgcaactgccctgggaccgggttctgggatgaggggggcagaccgggct<br>cccagcggccggcgagcacgtagcgacgtgtaggggtccgctccccaccccctcgccg<br>tctgacaacttttcag - 3'                                                                                                                                                                                                                                                                                                                                                                                                                                                                                                                                                                                                                                                                                | 204               |
| ncRNA-a2 T21<br>HBB 5'ss                  | 5'- gtgagtgcgttgcaagaccacgctgccgggtgcaaactggggggacttcctccctccctc<br>cccctgggcgccgtgcaactgccctgggaccgggttctgggatgaggggggcagaccgggct<br>cccagcggccggcgagcacgtagcgacgtgtaggggtccgctccccaccccctttttttt<br>tttttttttcag - 3'                                                                                                                                                                                                                                                                                                                                                                                                                                                                                                                                                                                                                                                                                  | 204               |
| HBB intron 2                              | 5'- gtgagtctatgggacgcttgatgttttcttccccttctttctatggttaagttcatgtcataggaa<br>ggggataagtaacagggtacagtttagaatgggaaacagacgaatgattgcatcagtg<br>aagtctcaggatcgttttagtttctttatttgctgttcataacaattgtttctttgttaattctg                                                                                                                                                                                                                                                                                                                                                                                                                                                                                                                                                                                                                                                                                                | 850               |

tttcttttttttcttctccgcaattttactattataacttaatgccttaacattgtgtataacaaaag  
gaaatatctctgagatacattaagtaacttaaaaaaaaaactttacacagtctgcctagtagcatt  
actatttggaaatatatgtgtgcttatttgcataattcataatctccctactttattttctttttta  
tgatacataatcattatacatatttatgggttaaagtgaatgttttaatatgtgtacacatattg  
accaaatacagggttaatttgcatttgaattttaaaaaatgctttctcttttaataatactttttgtt  
tatcttatttctaatactttccctaactctttctttcagggcaataatgatacaatgtatcatgcct  
ctttgcaccattctaaagaataacagtgataatttctgggttaaggcaatagcaatatctctgc  
atataaatatttctgatataaattgtaactgatgtaagaggtttcatattgctaatagcagcta  
caatccagctaccattctgctttttttatgggtgggataaggctggattattctgagccaagc  
taggcccttttgctaatacatgttcataccttctctctccacag - 3'

HBB ncRNA-a2 intron HBB 5'ss 5'- gtgagtctgttgcgaagaccacgctgccgggtgcaaactgggggggacttctccctccctc 204  
ccccctgggcgccgtgcaactgccctgggaccgggttctgggatgaggggggcagaccgggct  
ccccagcggccggcgagcacgtagcgacgtgtaggggtccgctccccacccctcgccgc  
tctgacaactttcag - 3'

HBB intron 2 with ncRNA-a2 PPT 5'- gtgagtctatgggacgcttgatgttttctttcccttctttctatgggtaagttcatgtcataggaa 845  
ggggataagtaacagggtacagtttagaatgggaaacagacgaatgattgcatcagtgagg  
aagtctcaggatcgttttagtttcttttatttctgttcataacaattgttttctttgttaattctgc  
tttcttttttttcttctccgcaattttactattataacttaatgccttaacattgtgtataacaaaag  
gaaatatctctgagatacattaagtaacttaaaaaaaaaactttacacagtctgcctagtagcatt  
actatttggaaatatatgtgtgcttatttgcataattcataatctccctactttattttctttttta  
tgatacataatcattatacatatttatgggttaaagtgaatgttttaatatgtgtacacatattg  
accaaatacagggttaatttgcatttgaattttaaaaaatgctttctcttttaataatactttttgtt  
tatcttatttctaatactttccctaactctttctttcagggcaataatgatacaatgtatcatgcct  
ctttgcaccattctaaagaataacagtgataatttctgggttaaggcaatagcaatatctctgc  
atataaatatttctgatataaattgtaactgatgtaagaggtttcatattgctaatagcagcta  
caatccagctaccattctgctttttttatgggtgggataaggctggattattctgagccaagc  
taggcccttttgctaatacatcgccgctctgacaactttcag - 3'

WT 5'- gtaaccgcttgcgaagaccacgctgccgggtgcaaactgggggggacttctccctccctc 204  
ccccctgggcgccgtgcaactgccctgggaccgggttctgggatgaggggggcagaccggg  
ctccccagcggccggcgagcacgtagcgacgtgtaggggtccgctccccacccctcgccg  
cctctgacaactttcag - 3'

FΔ1 = Δ1 5'- gtaacgccgggttgcgaactgggggggacttctccctccctccccctgggcgccgtgcaact 184  
gccctgggaccgggttctgggatgaggggggcagaccgggctccccagcggccggcgagc  
acgtagcgacgtgtaggggtccgctccccacccctcgccgctctgacaactttcag - 3'

FΔ2 5'- gtaacggacttctccctccctccccctgggcgccgtgcaactgccctgggaccgggttctgg 164  
gatgaggggggcagaccgggctccccagcggccggcgagcacgtagcgacgtgtaggg

tccgctccccaccccctcgccgctctgacaacttttcag - 3'

|          |                                                                                                                                                                                                 |     |
|----------|-------------------------------------------------------------------------------------------------------------------------------------------------------------------------------------------------|-----|
| FΔ3      | 5'- gtaaccctgggcgccgtgcaactgccctgggaccgggttctgggatgaggggggcagacc<br>gggctccccagcggccggcgagcacgtagcgacgtgtaggggtccgctccccaccccctcg<br>ccgctctgacaacttttcag - 3'                                  | 144 |
| FΔ4      | 5'- gtaaccctgggaccgggttctgggatgaggggggcagaccgggctccccagcggccggcg<br>cagcacgtagcgacgtgtaggggtccgctccccaccccctcgccgctctgacaacttttcag -<br>3'                                                      | 124 |
| FΔ5      | 5'- gtaacatgaggggggcagaccgggctccccagcggccggcgagcacgtagcgacgtgt<br>agggtccgctccccaccccctcgccgctctgacaacttttcag - 3'                                                                              | 104 |
| FΔ6      | 5'- gtaactccccagcggccggcgagcacgtagcgacgtgtaggggtccgctccccaccccctc<br>gccgctctgacaacttttcag - 3'                                                                                                 | 84  |
| FΔ7      | 5'- gtaacacgtagcgacgtgtaggggtccgctccccaccccctcgccgctctgacaacttttcag<br>- 3'                                                                                                                     | 64  |
| FΔ8      | 5'- gtaaccgctccccaccccctcgccgctctgacaacttttcag - 3'                                                                                                                                             | 44  |
| RΔ1 = Δ8 | 5'- gtaaccgcttgcaagaccacgctgccgggtgcaaactggggggacttctcctccct<br>ccccctgggcgccgtgcaactgccctgggaccgggttctgggatgaggggggcagaccggg<br>ctccccagcggccggcgagcccgtccccaccccctcgccgctctgacaacttttcag - 3' | 184 |
| RΔ2      | 5'- gtaaccgcttgcaagaccacgctgccgggtgcaaactggggggacttctcctccct<br>ccccctgggcgccgtgcaactgccctgggaccgggttctgggatgaggggggcagaccggg<br>cccgtccccaccccctcgccgctctgacaacttttcag - 3'                    | 164 |
| RΔ3      | 5'- gtaaccgcttgcaagaccacgctgccgggtgcaaactggggggacttctcctccct<br>ccccctgggcgccgtgcaactgccctgggaccgggttctgggctccccaccccctcgccg<br>cctctgacaacttttcag - 3'                                         | 144 |
| RΔ4      | 5'- gtaaccgcttgcaagaccacgctgccgggtgcaaactggggggacttctcctccct<br>ccccctgggcgccgtgcaactgccgctccccaccccctcgccgctctgacaacttttcag - 3'                                                               | 124 |
| RΔ5      | 5'- gtaaccgcttgcaagaccacgctgccgggtgcaaactggggggacttctcctccct<br>ccccgtccccaccccctcgccgctctgacaacttttcag - 3'                                                                                    | 104 |
| RΔ6      | 5'- gtaaccgcttgcaagaccacgctgccgggtgcaaactggggccgctccccaccccctcg<br>ccgctctgacaacttttcag - 3'                                                                                                    | 84  |

|       |                                                                                                                                                                                                                                                   |     |
|-------|---------------------------------------------------------------------------------------------------------------------------------------------------------------------------------------------------------------------------------------------------|-----|
| RΔ7   | 5'- gtaaccgcgttgcaagaccacgctccgctccccaccccctcgccgcctctgacaacttttcag<br>- 3'                                                                                                                                                                       | 64  |
| Δ2    | 5'- gtaaccgcgttgcaagaccacgctggacttctcctccccctccccctggggcgccgtgcaact<br>gccctgggaccgggttctgggatgaggggggagaccgggctccccagcggccggcgagc<br>acgtagcgacgtgtaggggtccgctccccaccccctcgccgcctctgacaacttttcag - 3'                                            | 184 |
| Δ3    | 5'- gtaaccgcgttgcaagaccacgctgccgggtgcaaaactggggccctggggcgccgtgcaa<br>ctgccctgggaccgggttctgggatgaggggggagaccgggctccccagcggccggcgca<br>gcacgtagcgacgtgtaggggtccgctccccaccccctcgccgcctctgacaacttttcag - 3'                                           | 184 |
| Δ4    | 5'- gtaaccgcgttgcaagaccacgctgccgggtgcaaaactggggggacttctcctccccct<br>ccccctgggaccgggttctgggatgaggggggagaccgggctccccagcggccggcgag<br>cacgtagcgacgtgtaggggtccgctccccaccccctcgccgcctctgacaacttttcag - 3'                                              | 184 |
| Δ5    | 5'- gtaaccgcgttgcaagaccacgctgccgggtgcaaaactggggggacttctcctccccct<br>ccccctggggcgccgtgcaactgatgaggggggagaccgggctccccagcggccggcgag<br>cacgtagcgacgtgtaggggtccgctccccaccccctcgccgcctctgacaacttttcag - 3'                                             | 184 |
| Δ6    | 5'- gtaaccgcgttgcaagaccacgctgccgggtgcaaaactggggggacttctcctccccct<br>ccccctggggcgccgtgcaactgcctgggaccgggttctgggtccccagcggccggcgagc<br>acgtagcgacgtgtaggggtccgctccccaccccctcgccgcctctgacaacttttcag - 3'                                             | 184 |
| Δ7    | 5'- gtaaccgcgttgcaagaccacgctgccgggtgcaaaactggggggacttctcctccccct<br>ccccctggggcgccgtgcaactgcctgggaccgggttctgggatgaggggggagaccggg<br>cacgtagcgacgtgtaggggtccgctccccaccccctcgccgcctctgacaacttttcag - 3'                                             | 184 |
| 1xISE | 5'- gtaaccgcgttgcaagaccacgcttttggggcgccgggtgcaaaactggggggacttctcc<br>ctccccctccccctggggcgccgtgcaactgcctgggaccgggttctgggatgaggggggag<br>accgggctccccagcggccggcgagcacgtagcgacgtgtaggggtccgctccccacccc<br>tcgccgcctctgacaacttttcag - 3'              | 211 |
| 2xISE | 5'- gtaaccgcgttgcaagaccacgcttttgggctattgggcccgggtgcaaaactggggggact<br>tctcctccccctccccctggggcgccgtgcaactgcctgggaccgggttctgggatgagggg<br>ggcagaccgggctccccagcggccggcgagcacgtagcgacgtgtaggggtccgctcccc<br>accccctcgccgcctctgacaacttttcag - 3'       | 217 |
| 3xISE | 5'- gtaaccgcgttgcaagaccacgcttttgggctttgggctattgggcccgggtgcaaaactggg<br>gggacttctcctccccctccccctggggcgccgtgcaactgcctgggaccgggttctgggatg<br>aggggggagaccgggctccccagcggccggcgagcacgtagcgacgtgtaggggtccg<br>ctccccaccccctcgccgcctctgacaacttttcag - 3' | 224 |



|           |                                                                                                                                                                                                                                  |     |
|-----------|----------------------------------------------------------------------------------------------------------------------------------------------------------------------------------------------------------------------------------|-----|
| ISEctrl   | 5'- gtaaccgcgttgcaagaccacgctttcgcgccggggtgcaaacttgggggggacttctcc<br>ctcccctccccctgggcgccgtgcaactgccctgggaccgggttctgggatgaggggggag<br>accgggctccccagcggccggcgagcacgtagcgacgtgtaggggtccgctccccacccc<br>tcggcctctgacaacttttcag - 3' | 211 |
| Δ60       | 5'- gtaaccgcgttgcaagaccacgctgccgggtgcaaacttgggggggacttctcccctccct<br>cctccccagcggccggcgagcacgtagcgacgtgtaggggtccgctccccaccccctcgcc<br>gcctctgacaacttttcag - 3'                                                                   | 144 |
| 3xISE-Δ60 | 5'- gtaaccgcgttgcaagaccacgcttttgggctttgggctattgggcccgggtgcaaacttggg<br>gggacttctcccctcccctccccagcggccggcgagcacgtagcgacgtgtaggggtcc<br>gctccccaccccctcgccgcctctgacaacttttcag - 3'                                                 | 164 |
| T21       | 5'- gtaaccgcgttgcaagaccacgctgccgggtgcaaacttgggggggacttctcccctccct<br>ccccctgggcgccgtgcaactgccctgggaccgggttctgggatgaggggggagaccggg<br>ctccccagcggccggcgagcacgtagcgacgtgtaggggtccgctccccacccccttttttt<br>tttttttttttcag - 3'       | 204 |
| CtoT      | 5'- gtaaccgcgttgcaagaccacgctgccgggtgcaaacttgggggggacttctcccctccct<br>ccccctgggcgccgtgcaactgccctgggaccgggttctgggatgaggggggagaccggg<br>ctccccagcggccggcgagcacgtagcgacgtgtaggggtccgctccccaccccctgttgtt<br>ttgataatttttcag - 3'      | 204 |
| GAtot     | 5'- gtaaccgcgttgcaagaccacgctgccgggtgcaaacttgggggggacttctcccctccct<br>ccccctgggcgccgtgcaactgccctgggaccgggttctgggatgaggggggagaccggg<br>ctccccagcggccggcgagcacgtagcgacgtgtaggggtccgctccccaccccctctctc<br>ctctttcttttcag - 3'        | 204 |
| ΔPPT      | 5'- gtaaccgcgttgcaagaccacgctgccgggtgcaaacttgggggggacttctcccctccct<br>ccccctgggcgccgtgcaactgccctgggaccgggttctgggatgaggggggagaccggg<br>ctccccagcggccggcgagcacgtagcgacgtgtaggggtccgctccccaccccctcgcc<br>cctctgacaaccag - 3'         | 200 |
| Δ60-T21   | 5'- gtaaccgcgttgcaagaccacgctgccgggtgcaaacttgggggggacttctcccctccct<br>cctccccagcggccggcgagcacgtagcgacgtgtaggggtccgctccccaccccctttttt<br>tttttttttttcag - 3'                                                                       | 144 |

## Supplementary List of SRSF Binding Motifs

| Protein | Motif      | Reference | Protein | Motif        | Reference |
|---------|------------|-----------|---------|--------------|-----------|
| SRSF1   | GARGARGARG | (1)       | SRSF4   | AWGAWGAWGA   | (1)       |
|         | TGRWG      | (2)       |         | GAAGGA       | (2)       |
|         | RGAAGAAC   | (2)       | SRSF5   | YDTCTGWAGACA | (1)       |
|         | AGGACRRAGC | (2)       |         | YYWCWSG      | (3)       |
|         | SRSASGA    | (2)       |         | ACDGS        | (2)       |
| SRSF2   | RTCTGWAGA  | (1)       | SRSF6   | RARGAWGA     | (1)       |
|         | GRYMCMYR   | (3)       |         | GAAGAAGA     | (1)       |
|         | TGCYGY     | (3)       |         | TSCGKM       | (2)       |
|         | AGSAGAGTA  | (2)       |         | YRCRKM       | (3)       |
|         | TGTTCSAGWT | (2)       | SRSF7   | WRAWGAHRA    | (1)       |
|         | AGGAGAT    | (2)       |         | TCAACA       | (2)       |
|         | GRYYCSYR   | (2)       |         | ACGAGAGAY    | (2)       |
| SRSF3   | TCWTCHTC   | (1)       | SRSF9   | GACGAC       | (2)       |
|         | WCWWC      | (2)       |         | CTGGATT      | (2)       |
|         | CTCKTCY    | (2)       |         |              |           |

## Supplementary List of sgRNAs and Guide Target Sequences

| <u>Guide</u>          | <u>sequence</u>               |
|-----------------------|-------------------------------|
| ncRNA-a2 intron KO #1 | 5'- TTCGCAACGCGGTTACCGGA - 3' |
| #2                    | 5'- AGTCTCCAGTGCACCGGCTT - 3' |

| <u>Guide target</u>   | <u>sequence</u>                  |
|-----------------------|----------------------------------|
| ncRNA-a2 intron KO #1 | 5'- CCTTCCGGTAACCGCGTTGCGAA - 3' |
| #2                    | 5'- CCCAGTCTCCAGTGCACCGGCTT - 3' |

## References

1. Müller-McNicoll, M., Botti, V., de Jesus Domingues, A.M., Brandl, H., Schwich, O.D., Steiner, M.C., Curk, T., Poser, I., Zarnack, K. and Neugebauer, K.M. (2016) SR proteins are NXF1 adaptors that link alternative RNA processing to mRNA export. *Genes Dev.*, **30**, 553-566.
2. Mueller, W.F. and Hertel, K.J. (2011) The role of SR and SR-related proteins in pre-mRNA splicing. In Lorkovic, Z. (ed.), *RNA Binding Proteins*. Landes Bioscience and Springer Science+Business Media, New York, Vol. I, pp. 1-21.
3. Paz, I., Akerman, M., Dror, I., Kosti, I. and Mandel-Gutfreund, Y. (2010) SFmap: a web server for motif analysis and prediction of splicing factor binding sites. *Nucleic Acids Res.*, **38**, W281-285.
4. Sironi, M., Menozzi, G., Riva, L., Cagliani, R., Comi, G.P., Bresolin, N., Giorda, R. and Pozzoli, U. (2004) Silencer elements as possible inhibitors of pseudoexon splicing. *Nucleic Acids Res.*, **32**, 1783-1791.
5. Wang, Z., Rolish, M.E., Yeo, G., Tung, V., Mawson, M. and Burge, C.B. (2004) Systematic Identification and Analysis of Exonic Splicing Silencers. *Cell*, **119**, 831-845.
6. Yeo, G. and Burge, C.B. (2004) Maximum Entropy Modeling of Short Sequence Motifs with Applications to RNA Splicing Signals. *J. Comput. Biol.*, **11**, 377-394.
